# Supplementary material for: Unraveling the Nature of Hydrogen Bonds of “Proton Sponges” Based on Car-Parrinello and Metadynamics Approaches
Source: MDPI journal article supplement (doi:10.3390/ijms24021542), 2023-01-12
Supplement: s1 [file s1]

# Supplementary Information

## Unraveling Nature of Hydrogen Bonds of "Proton Sponges" based on Car-Parrinello and metadynamics approaches

Beata Kizior <sup>a</sup>, Mariusz, Michalczyk <sup>a</sup>, Jarosław J. Panek <sup>b</sup>, Wiktor Zierkiewicz <sup>a</sup> and Aneta Jezierska <sup>b</sup> \*

<sup>a</sup> Faculty of Chemistry, Wrocław University of Science and Technology, ul. Wybrzeże Wyspiańskiego 27, 50-370 Wrocław, Poland

<sup>b</sup> Faculty of Chemistry, University of Wrocław, ul. F. Joliot-Curie 14, 50-383 Wrocław, Poland, Tel: +(+48) (71) (3757 224); Fax: +(48) (71) (3282 348)  
e-mail: aneta.jezierska@chem.uni.wroc.pl (A. Jezierska)

\*Corresponding author: Aneta Jezierska, aneta.jezierska@chem.uni.wroc.pl

phone. +48 71 3757 224; fax: +48 71 3282 348

### Table of contents:

- 1. Figure S1.** Molecular structures of the studied protonated form of 1,8-bis(dimethylamino)naphthalene (DMANH<sup>+</sup>) and its derivatives obtained as a result of CPMD geometry optimization with PBE functional. Color coding: red - oxygen; blue - nitrogen; gray - carbon; white - hydrogen. The solid line between nitrogen atoms indicates the presence of intramolecular hydrogen bonding (HB).
- 2. Figure S2.** Crystal unit cells of the studied compounds (suitable references are included in the manuscript). The dotted lines indicate the presence of intramolecular hydrogen bridges. The data were used to construct CPMD models for crystalline phase simulations. Color coding: red - oxygen; blue - nitrogen; gray - carbon; white – hydrogen, green – chlorine, orange – bromine.
- 3. Figure S3.** Complete 2-D fingerprint plot based on Hirshfeld surface of the studied compounds (1)-(4) calculated from their experimental crystal structures. The X and Y axes correspond respectively to  $d_i$  and  $d_e$ , where  $d_i$  ( $d_e$ ) is the distance from a point on the surface to the nearest nucleus inside (outside) the surface. The color scale shows the values of the  $d_{\text{norm}}$  Hirshfeld normalized contact distance.

4. **Figure S4.** Time-evolution of metric parameters of atoms involved in the intramolecular hydrogen bond  $\text{N-H}\cdots\text{N}$ . The CPMD results in the gas phase at 100 K for  $\text{DMANH}^+$  and its derivatives. The calculations were carried out using the OLYP functional.
5. **Figure S5.** Time-evolution of metric parameters of atoms involved in the intramolecular hydrogen bond  $\text{N-H}\cdots\text{N}$ . The CPMD results in the gas phase at 300 K for  $\text{DMANH}^+$  and its derivatives. The calculations were carried out using the OLYP functional.
6. **Figure S6.** Time-evolution of metric parameters of atoms involved in the intramolecular hydrogen bond  $\text{N-H}\cdots\text{N}$ . The CPMD results in the crystalline phase at 100 K for  $\text{DMANH}^+$  and its derivatives. The calculations were carried out using the OLYP functional.
7. **Figure S7.** Time-evolution of metric parameters of atoms involved in the intramolecular hydrogen bond  $\text{N-H}\cdots\text{N}$ . The CPMD results in the crystalline phase at 300 K for  $\text{DMANH}^+$  and its derivatives. The calculations were carried out using the OLYP functional.
8. **Table S1.** The proton possession percentage during the CPMD simulation of the  $\text{DMANH}^+$  and its derivatives. The reference nitrogen atoms are those at the position 1 of the aromatic system, i.e. the left-side amine functions in Figure 1 in the manuscript. The calculations were carried out using the OLYP functional. The main manuscript body contains corresponding data for the PBE functional.
9. **Figure S8.** Potential energy profile obtained as a result of a scan with optimization method for the investigated “proton sponges”. The simulations were performed at the PBE0-D3/def2-TZVP level of theory.
10. **Table S2.** QTAIM parameters for BCPs of  $\text{N}\cdots\text{H}$  and  $\text{H}\cdots\text{N}$  interactions (presented one above the other in single table cell) within studied compounds in the gas phase. All QTAIM data are given in a.u.
11. XYZ coordinates.

(1)

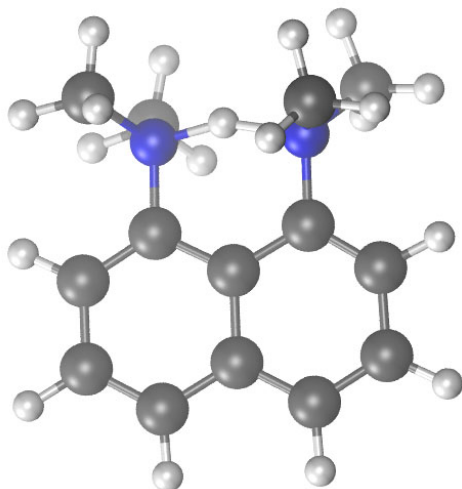

(2)

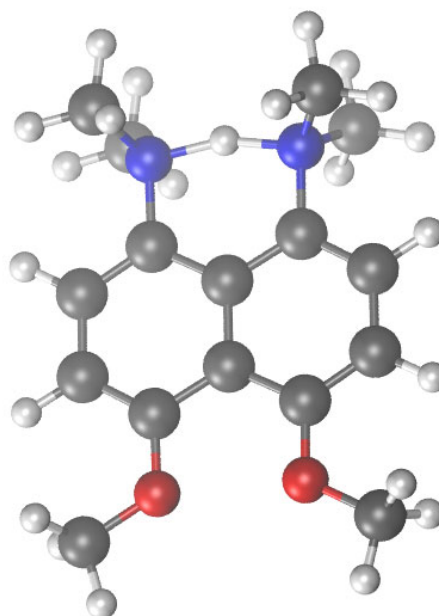

(3)

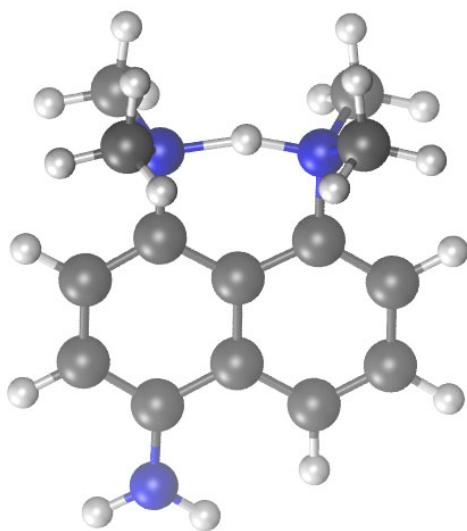

(4)

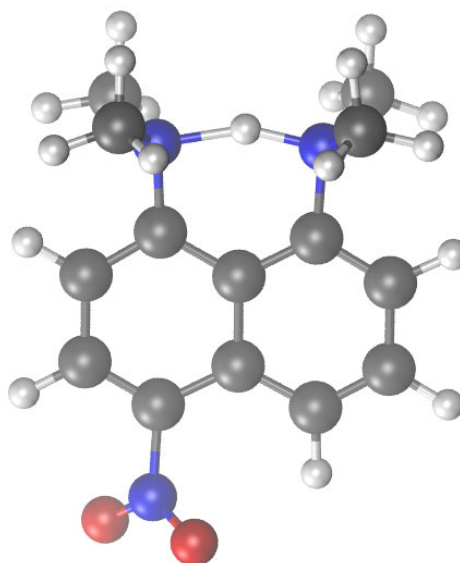

**Figure S1.** Molecular structures of the studied protonated form of 1,8-bis(dimethylamino)naphthalene ( $\text{DMANH}^+$ ) and its derivatives obtained as a result of CPMD geometry optimization with PBE functional. Color coding: red - oxygen; blue - nitrogen; gray - carbon; white - hydrogen. The solid line between nitrogen atoms indicates the presence of intramolecular hydrogen bonding (HB).

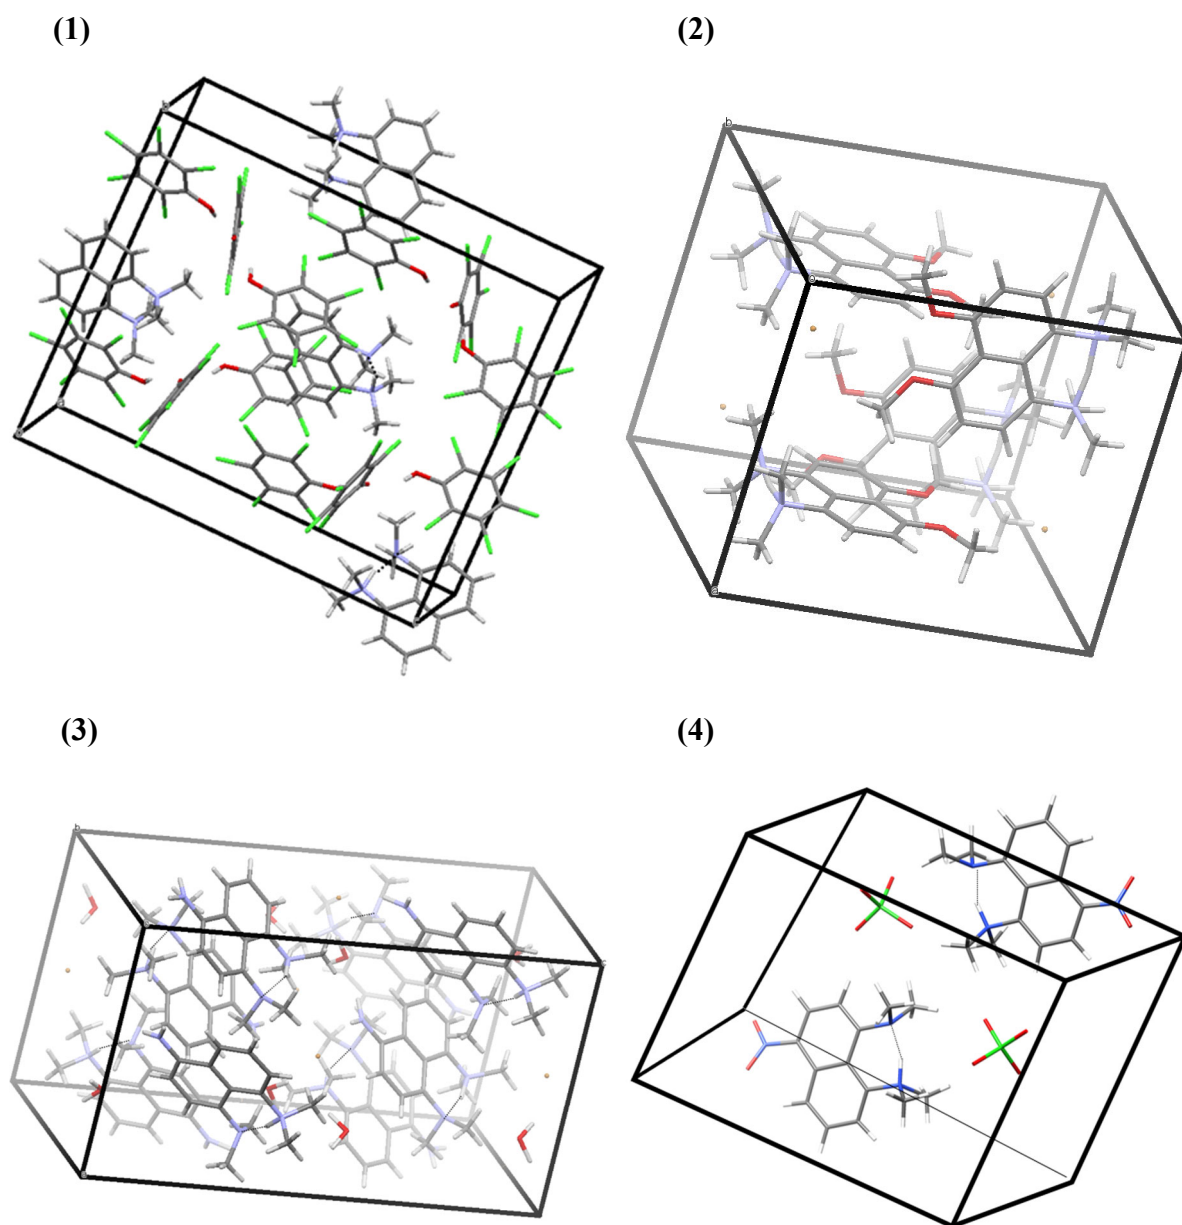

**Figure S2.** Crystal unit cells of the studied compounds (suitable references are included in the manuscript). The dotted lines indicate the presence of intramolecular hydrogen bridges. The data were used to construct CPMD models for crystalline phase simulations. Color coding: red - oxygen; blue - nitrogen; gray - carbon; white – hydrogen, green – chlorine, orange – bromine.

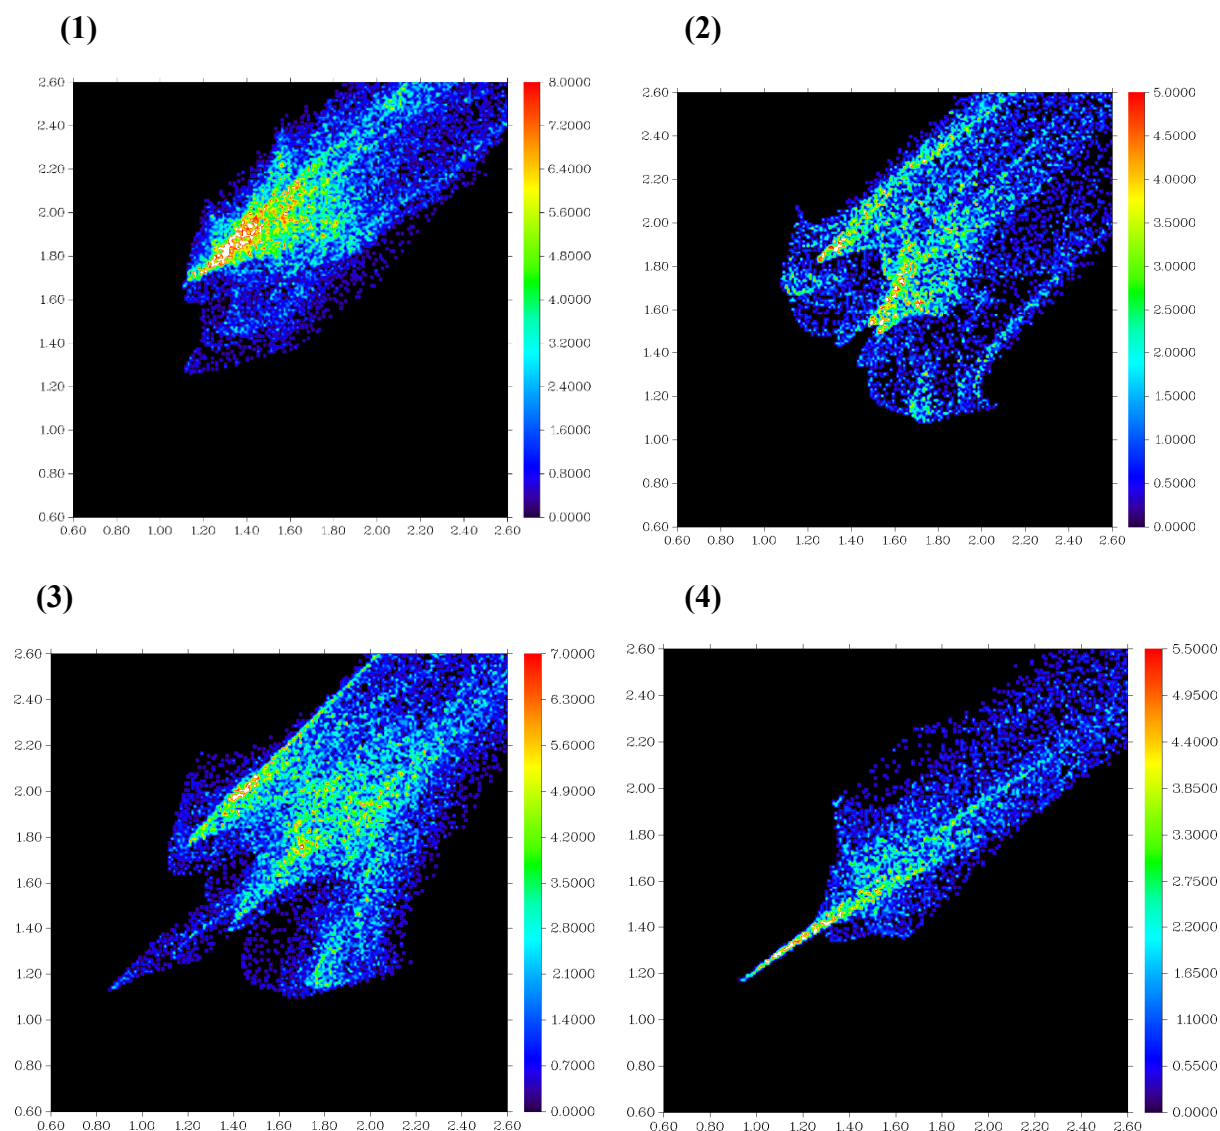

**Figure S3.** Complete 2-D fingerprint plot based on Hirshfeld surface of the studied compounds (1)-(4) calculated from their experimental crystal structures. The X and Y axes correspond respectively to  $d_i$  and  $d_e$ , where  $d_i$  ( $d_e$ ) is the distance from a point on the surface to the nearest nucleus inside (outside) the surface. The color scale shows the values of the  $d_{\text{norm}}$  Hirshfeld normalized contact distance.

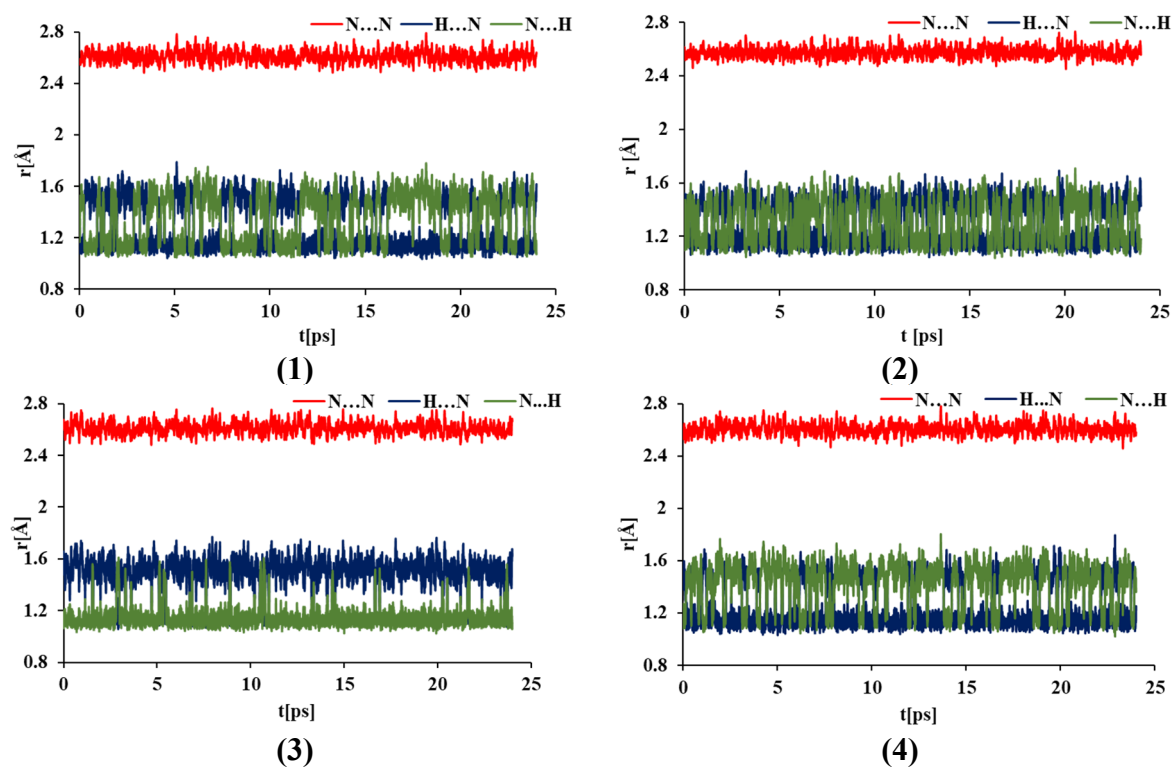

**Figure S4.** Time-evolution of metric parameters of atoms involved in the intramolecular hydrogen bond N-H...N. The CPMD results in the gas phase at 100 K for  $\text{DMANH}^+$  and its derivatives. The calculations were carried out using the OLYP functional.

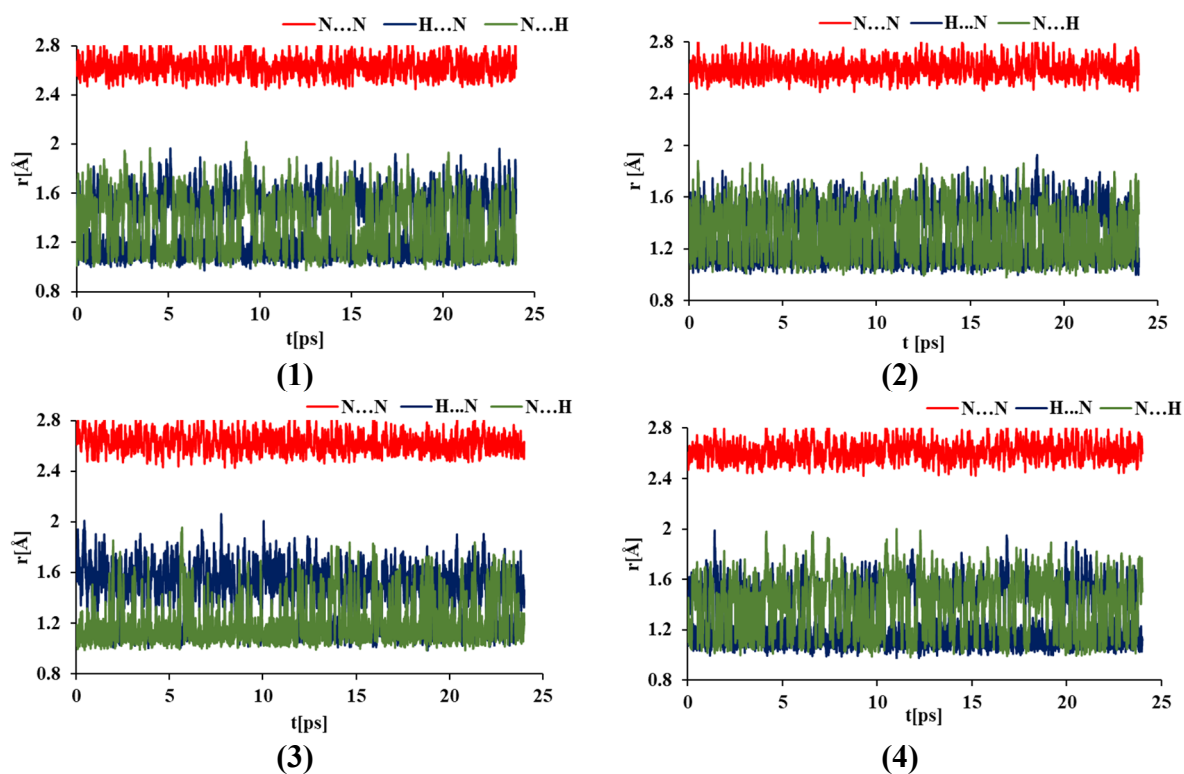

**Figure S5.** Time-evolution of metric parameters of atoms involved in the intramolecular hydrogen bond  $N-H\cdots N$ . The CPMD results in the gas phase at 300 K for  $DMANH^+$  and its derivatives. The calculations were carried out using the OLYP functional.

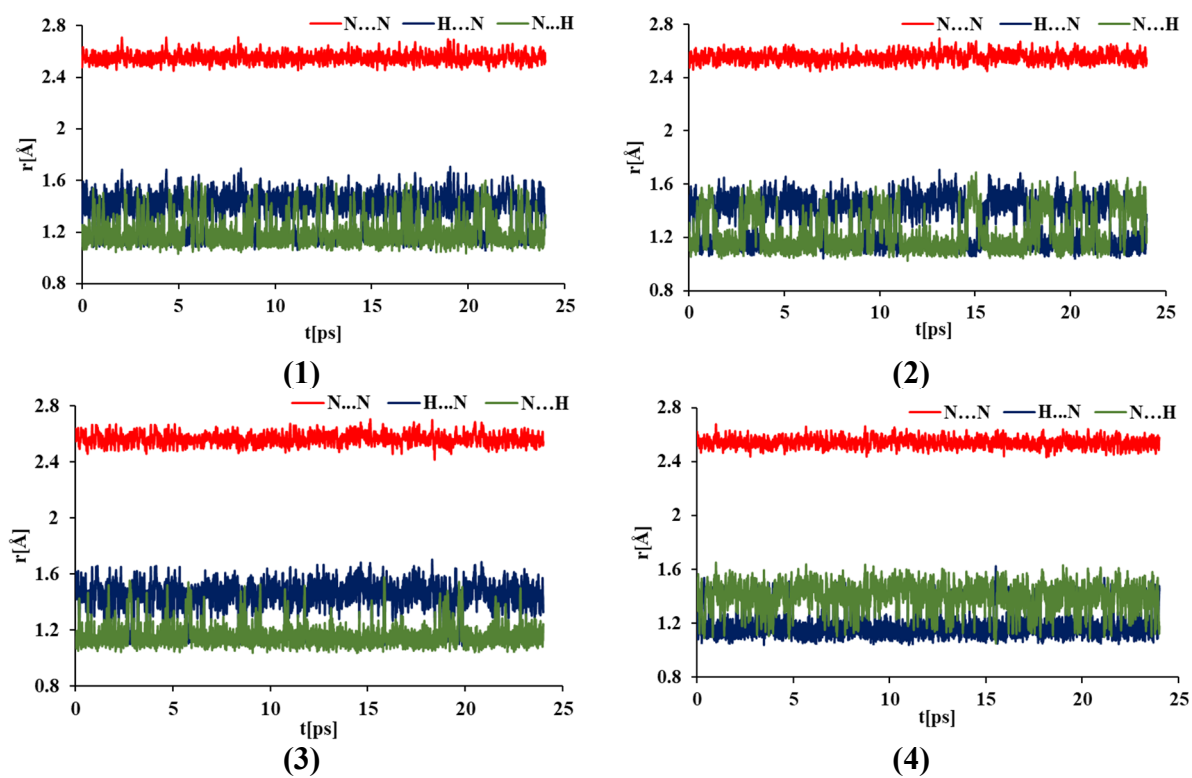

**Figure S6.** Time-evolution of metric parameters of atoms involved in the intramolecular hydrogen bond  $\text{N-H}\cdots\text{N}$ . The CPMD results in the crystalline phase at 100 K for  $\text{DMANH}^+$  and its derivatives. The calculations were carried out using the OLYP functional.



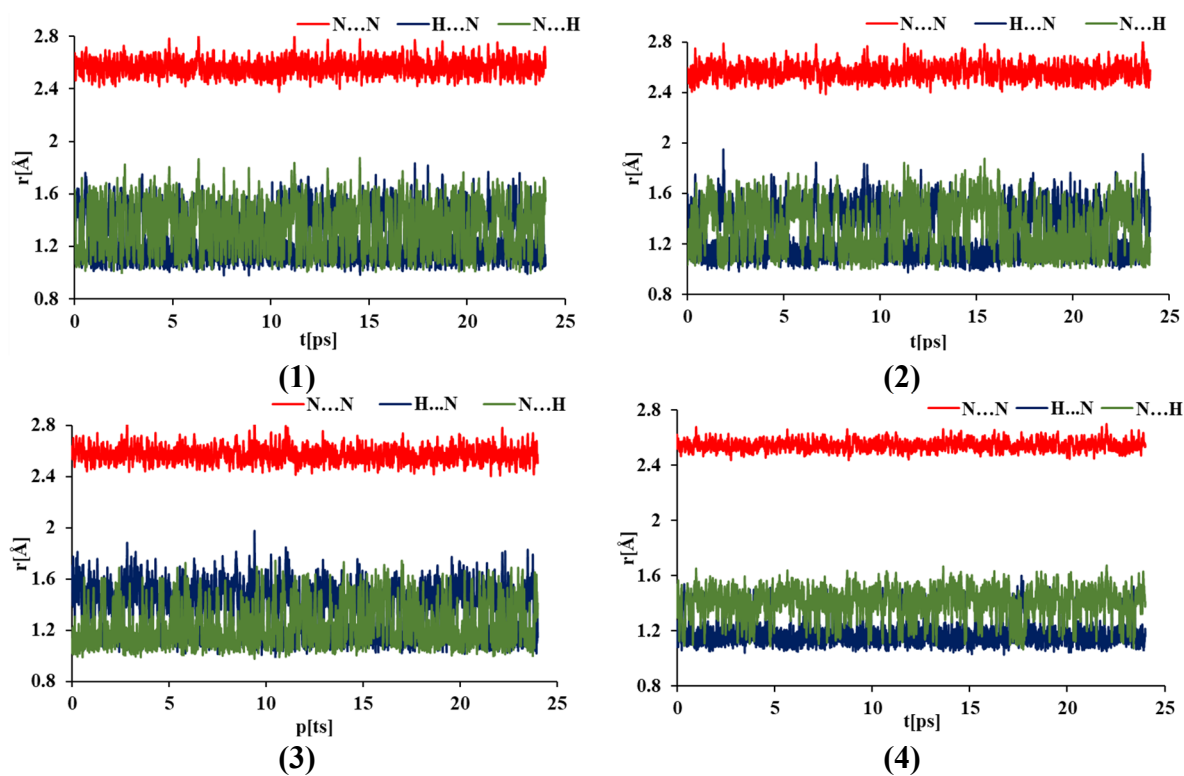

**Figure S7.** Time-evolution of metric parameters of atoms involved in the intramolecular hydrogen bond  $\text{N-H}\cdots\text{N}$ . The CPMD results in the crystalline phase at 300 K for  $\text{DMANH}^+$  and its derivatives. The calculations were carried out using the OLYP functional.

**Table S1.** The proton possession percentage during the CPMD simulation of the DMANH<sup>+</sup> and its derivatives. The reference nitrogen atoms are those at the position 1 of the aromatic system, i.e. the left-side amine functions in Figure 1 in the manuscript. The calculations were carried out using the OLYP functional. The main manuscript body contains corresponding data for the PBE functional.

| Compound | Proton possession (%) |       |                   |       |
|----------|-----------------------|-------|-------------------|-------|
|          | Gas phase             |       | Crystalline phase |       |
|          | 100 K                 | 300 K | 100 K             | 300 K |
| (1)      | 44.0                  | 48.4  | 76.9              | 59.5  |
| (2)      | 48.6                  | 47.9  | 33.4              | 54.7  |
| (3)      | 93.7                  | 75.0  | 91.6              | 66.0  |
| (4)      | 26.4                  | 38.2  | 14.6              | 15.1  |

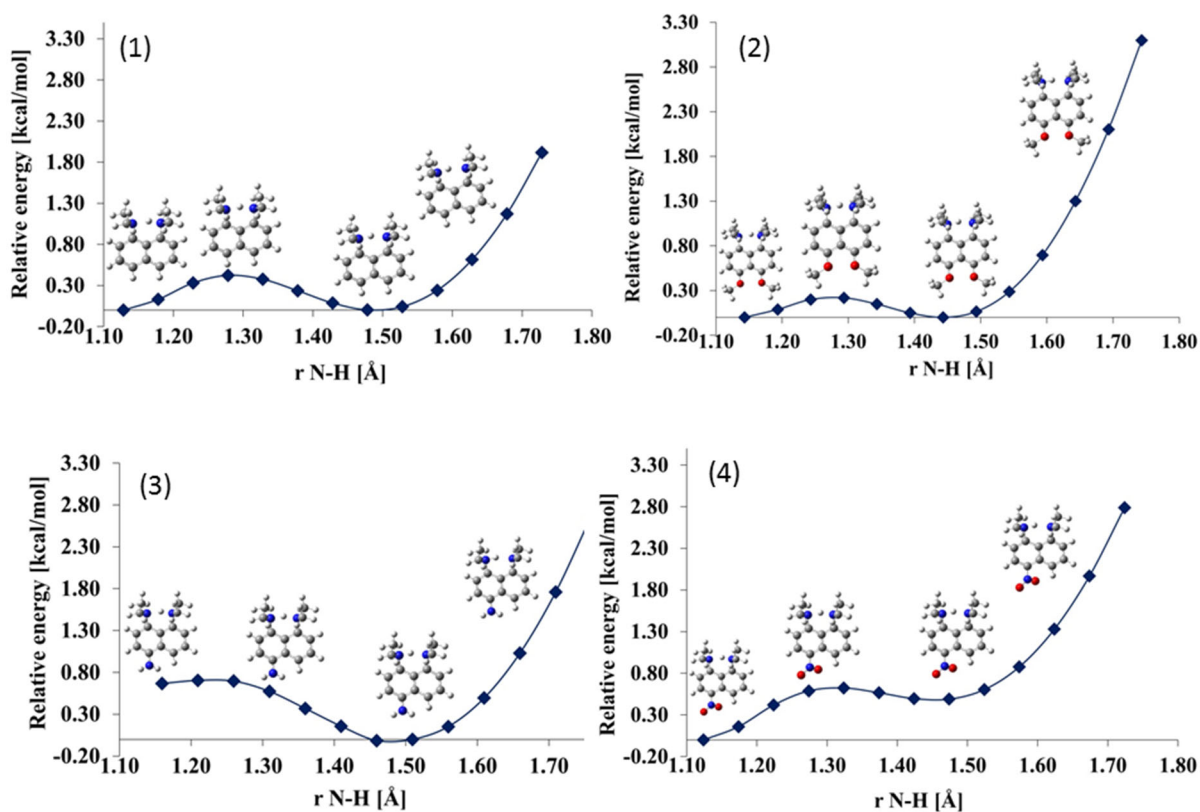

**Figure S8.** Potential energy profile obtained as a result of a scan with optimization method for the investigated “proton sponges”. The simulations were performed at the PBE0-D3/def2-TZVP level of theory.

**Table S2.** QTAIM parameters for BCPs of N $\cdots$ H and H $\cdots$ N interactions (presented one above the other in single table cell) within studied compounds in the gas phase. All QTAIM data are given in a.u.

| Compound | Snapshot time [ps] | 100 K  |                |               |        |        |       | 300 K  |                |               |        |        |       |
|----------|--------------------|--------|----------------|---------------|--------|--------|-------|--------|----------------|---------------|--------|--------|-------|
|          |                    | $\rho$ | $\nabla^2\rho$ | $\varepsilon$ | H      | V      | G     | $\rho$ | $\nabla^2\rho$ | $\varepsilon$ | H      | V      | G     |
| (1)      | 0                  | 0.228  | -0.779         | 0.005         | -0.253 | -0.312 | 0.059 | 0.121  | -0.026         | 0.016         | -0.067 | -0.127 | 0.060 |
|          |                    | 0.103  | 0.023          | 0.019         | -0.049 | -0.105 | 0.055 | 0.202  | -0.511         | 0.004         | -0.187 | -0.247 | 0.060 |
|          | 8                  | 0.229  | -0.798         | 0.006         | -0.253 | -0.307 | 0.053 | 0.308  | -1.670         | 0.004         | -0.478 | -0.539 | 0.061 |
|          |                    | 0.090  | 0.033          | 0.019         | -0.039 | -0.087 | 0.048 | 0.080  | 0.099          | 0.025         | -0.029 | -0.082 | 0.054 |
|          | 16                 | 0.140  | -0.079         | 0.013         | -0.087 | -0.155 | 0.067 | 0.080  | 0.062          | 0.021         | -0.031 | -0.077 | 0.046 |
|          |                    | 0.199  | -0.479         | 0.005         | -0.187 | -0.254 | 0.067 | 0.266  | -1.173         | 0.006         | -0.349 | -0.405 | 0.056 |
|          | 24                 | 0.208  | -0.564         | 0.009         | -0.208 | -0.276 | 0.067 | 0.091  | 0.041          | 0.017         | -0.039 | -0.089 | 0.050 |
|          |                    | 0.132  | -0.053         | 0.010         | -0.078 | -0.143 | 0.065 | 0.237  | -0.867         | 0.007         | -0.272 | -0.328 | 0.056 |
| (2)      | 0                  | 0.104  | 0.018          | 0.019         | -0.050 | -0.104 | 0.054 | 0.104  | 0.018          | 0.019         | -0.050 | -0.104 | 0.054 |
|          |                    | 0.225  | -0.752         | 0.008         | -0.247 | -0.306 | 0.059 | 0.225  | -0.752         | 0.008         | -0.247 | -0.305 | 0.058 |
|          | 8                  | 0.231  | -0.795         | 0.005         | -0.261 | -0.324 | 0.063 | 0.111  | -0.003         | 0.027         | -0.057 | -0.113 | 0.056 |
|          |                    | 0.111  | 0.014          | 0.021         | -0.056 | -0.116 | 0.060 | 0.210  | -0.610         | 0.006         | -0.210 | -0.268 | 0.058 |
|          | 16                 | 0.211  | -0.591         | 0.006         | -0.213 | -0.278 | 0.065 | 0.210  | -0.581         | 0.004         | -0.214 | -0.283 | 0.069 |
|          |                    | 0.125  | -0.028         | 0.015         | -0.070 | -0.133 | 0.063 | 0.133  | -0.048         | 0.015         | -0.079 | -0.146 | 0.067 |
|          | 24                 | 0.139  | -0.122         | 0.014         | -0.088 | -0.146 | 0.058 | 0.206  | -0.516         | 0.011         | -0.202 | -0.276 | 0.073 |
|          |                    | 0.171  | -0.298         | 0.012         | -0.135 | -0.196 | 0.061 | 0.150  | -0.103         | 0.016         | -0.101 | -0.175 | 0.075 |
| (3)      | 0                  | 0.163  | -0.211         | 0.008         | -0.122 | -0.191 | 0.069 | 0.116  | 0.003          | 0.015         | -0.061 | -0.123 | 0.062 |
|          |                    | 0.171  | -0.267         | 0.011         | -0.135 | -0.203 | 0.068 | 0.226  | -0.745         | 0.010         | -0.250 | -0.314 | 0.064 |
|          | 8                  | 0.159  | -0.203         | 0.010         | -0.114 | -0.178 | 0.063 | 0.163  | -0.273         | 0.013         | -0.124 | -0.180 | 0.056 |
|          |                    | 0.159  | -0.210         | 0.011         | -0.114 | -0.177 | 0.062 | 0.129  | -0.105         | 0.020         | -0.077 | -0.129 | 0.051 |
|          | 16                 | 0.090  | 0.044          | 0.019         | -0.039 | -0.089 | 0.050 | 0.153  | -0.169         | 0.010         | -0.106 | -0.170 | 0.064 |
|          |                    | 0.241  | -0.922         | 0.005         | -0.286 | -0.342 | 0.056 | 0.168  | -0.259         | 0.015         | -0.129 | -0.193 | 0.064 |
|          | 24                 | 0.107  | 0.011          | 0.022         | -0.053 | -0.109 | 0.056 | 0.058  | 0.078          | 0.030         | -0.016 | -0.051 | 0.035 |
|          |                    | 0.217  | -0.675         | 0.004         | -0.227 | -0.285 | 0.058 | 0.287  | -1.400         | 0.003         | -0.400 | -0.450 | 0.050 |
| (4)      | 0                  | 0.103  | 0.022          | 0.019         | -0.050 | -0.105 | 0.055 | 0.216  | -0.612         | 0.004         | -0.222 | -0.291 | 0.069 |
|          |                    | 0.229  | -0.781         | 0.006         | -0.254 | -0.313 | 0.059 | 0.130  | -0.033         | 0.018         | -0.075 | -0.141 | 0.066 |
|          | 8                  | 0.097  | 0.034          | 0.025         | -0.044 | -0.097 | 0.052 | 0.108  | 0.030          | 0.017         | -0.054 | -0.114 | 0.060 |
|          |                    | 0.238  | -0.886         | 0.006         | -0.280 | -0.338 | 0.058 | 0.242  | -0.911         | 0.008         | -0.291 | -0.355 | 0.064 |
|          | 16                 | 0.112  | -0.007         | 0.011         | -0.058 | -0.115 | 0.057 | 0.252  | -1.024         | 0.001         | -0.312 | -0.368 | 0.056 |
|          |                    | 0.213  | -0.635         | 0.009         | -0.219 | -0.279 | 0.060 | 0.087  | 0.055          | 0.028         | -0.036 | -0.085 | 0.050 |
|          | 24                 | 0.227  | -0.788         | 0.004         | -0.251 | -0.305 | 0.054 | 0.064  | 0.092          | 0.020         | -0.019 | -0.060 | 0.042 |
|          |                    | 0.092  | 0.031          | 0.016         | -0.041 | -0.090 | 0.049 | 0.305  | -1.627         | 0.004         | -0.461 | -0.515 | 0.054 |

## XYZ coordinates

The models for CPMD and DFT simulations were prepared based on X-ray data. The xyz experimental coordinates are provided below for the studied compounds. Suitable references for the crystal structures are cited in the manuscript.

**Compound (1) CCDC identifiers: TAPCES (1266338)**

### XYZ for single molecule:

35

TAPCES

|   |           |           |           |
|---|-----------|-----------|-----------|
| N | 0.384524  | 0.462592  | 6.779898  |
| H | -0.386342 | -0.336855 | 6.849551  |
| N | -1.303904 | -1.354425 | 7.393169  |
| C | 0.497699  | 0.827797  | 8.204231  |
| C | 1.210160  | 1.920241  | 8.599202  |
| C | 1.355606  | 2.201732  | 9.968706  |
| C | 0.836317  | 1.356426  | 10.900391 |
| C | -0.414749 | -0.680214 | 11.492341 |
| C | -1.111301 | -1.791336 | 11.128642 |
| C | -1.380604 | -2.035973 | 9.768073  |
| C | -0.922676 | -1.182162 | 8.802881  |
| C | -0.121584 | -0.056365 | 9.133479  |
| C | 0.103403  | 0.208283  | 10.522884 |
| C | -0.052270 | 1.566210  | 5.903651  |
| C | 1.627182  | -0.175432 | 6.276284  |
| C | -0.993126 | -2.696509 | 6.859908  |
| C | -2.725984 | -0.991388 | 7.191115  |
| H | 1.636272  | 2.474718  | 7.988774  |
| H | 1.818080  | 2.931641  | 10.253004 |
| H | 0.943129  | 1.582552  | 11.824766 |
| H | -0.227260 | -0.453587 | 12.425853 |
| H | -1.443101 | -2.396341 | 11.806490 |
| H | -1.874895 | -2.841590 | 9.491492  |
| H | -0.874951 | 1.941086  | 6.213942  |
| H | -0.181808 | 1.200672  | 5.015829  |
| H | 0.636328  | 2.227914  | 5.864662  |
| H | 2.340778  | 0.473598  | 6.220034  |
| H | 1.931710  | -0.928853 | 6.884073  |
| H | 1.443101  | -0.565316 | 5.387447  |
| H | -1.590820 | -3.381893 | 7.261783  |

|   |           |           |          |
|---|-----------|-----------|----------|
| H | -1.272656 | -2.689839 | 5.933705 |
| H | 0.022726  | -2.841590 | 7.030283 |
| H | -2.897565 | -0.001668 | 7.479068 |
| H | -3.408900 | -1.614237 | 7.631371 |
| H | -2.931654 | -1.023906 | 6.244402 |

### XYZ for crystal:

292

#### TAPCES

|   |           |           |           |
|---|-----------|-----------|-----------|
| N | 11.747524 | 17.138592 | 6.779898  |
| H | 10.976658 | 16.339145 | 6.849551  |
| N | 10.059096 | 15.321575 | 7.393169  |
| C | 11.860699 | 17.503797 | 8.204231  |
| C | 12.573160 | 18.596241 | 8.599202  |
| C | 12.718606 | 18.877732 | 9.968706  |
| C | 12.199317 | 18.032426 | 10.900391 |
| C | 10.948251 | 15.995786 | 11.492341 |
| C | 10.251699 | 14.884664 | 11.128642 |
| C | 9.982396  | 14.640027 | 9.768073  |
| C | 10.440324 | 15.493838 | 8.802881  |
| C | 11.241416 | 16.619635 | 9.133479  |
| C | 11.466403 | 16.884283 | 10.522884 |
| C | 11.310730 | 18.242210 | 5.903651  |
| C | 12.990182 | 16.500568 | 6.276284  |
| C | 10.369874 | 13.979491 | 6.859908  |
| C | 8.637016  | 15.684612 | 7.191115  |
| H | 12.999272 | 19.150718 | 7.988774  |
| H | 13.181080 | 19.607641 | 10.253004 |
| H | 12.306129 | 18.258552 | 11.824766 |
| H | 11.135740 | 16.222413 | 12.425853 |
| H | 9.919899  | 14.279659 | 11.806490 |
| H | 9.488105  | 13.834410 | 9.491492  |
| H | 10.488049 | 18.617086 | 6.213942  |
| H | 11.181192 | 17.876672 | 5.015829  |
| H | 11.999328 | 18.903914 | 5.864662  |
| H | 13.703778 | 17.149598 | 6.220034  |
| H | 13.294710 | 15.747147 | 6.884073  |
| H | 12.806101 | 16.110684 | 5.387447  |
| H | 9.772180  | 13.294107 | 7.261783  |
| H | 10.090344 | 13.986161 | 5.933705  |

|   |           |           |           |
|---|-----------|-----------|-----------|
| H | 11.385726 | 13.834410 | 7.030283  |
| H | 8.465435  | 16.674332 | 7.479068  |
| H | 7.954100  | 15.061763 | 7.631371  |
| H | 8.431346  | 15.652094 | 6.244402  |
| N | 6.066024  | 7.875408  | 13.527102 |
| H | 5.295158  | 8.674855  | 13.457449 |
| N | 4.377596  | 9.692425  | 12.913831 |
| C | 6.179199  | 7.510203  | 12.102769 |
| C | 6.891660  | 6.417759  | 11.707798 |
| C | 7.037106  | 6.136268  | 10.338294 |
| C | 6.517817  | 6.981574  | 9.406609  |
| C | 5.266751  | 9.018214  | 8.814659  |
| C | 4.570199  | 10.129336 | 9.178358  |
| C | 4.300896  | 10.373973 | 10.538927 |
| C | 4.758824  | 9.520162  | 11.504119 |
| C | 5.559916  | 8.394365  | 11.173521 |
| C | 5.784903  | 8.129717  | 9.784116  |
| C | 5.629230  | 6.771790  | 14.403349 |
| C | 7.308682  | 8.513432  | 14.030716 |
| C | 4.688374  | 11.034509 | 13.447092 |
| C | 2.955516  | 9.329388  | 13.115885 |
| H | 7.317772  | 5.863282  | 12.318226 |
| H | 7.499580  | 5.406359  | 10.053996 |
| H | 6.624629  | 6.755448  | 8.482234  |
| H | 5.454240  | 8.791587  | 7.881147  |
| H | 4.238399  | 10.734341 | 8.500510  |
| H | 3.806605  | 11.179590 | 10.815508 |
| H | 4.806549  | 6.396914  | 14.093058 |
| H | 5.499692  | 7.137328  | 15.291171 |
| H | 6.317828  | 6.110086  | 14.442338 |
| H | 8.022278  | 7.864402  | 14.086966 |
| H | 7.613210  | 9.266853  | 13.422927 |
| H | 7.124601  | 8.903316  | 14.919553 |
| H | 4.090680  | 11.719893 | 13.045217 |
| H | 4.408844  | 11.027839 | 14.373295 |
| H | 5.704226  | 11.179590 | 13.276717 |
| H | 2.783935  | 8.339668  | 12.827932 |
| H | 2.272600  | 9.952237  | 12.675629 |
| H | 2.749846  | 9.361906  | 14.062597 |
| N | -0.384524 | 8.800592  | 3.373602  |

|   |           |           |           |
|---|-----------|-----------|-----------|
| H | 0.386342  | 8.001145  | 3.303949  |
| N | 1.303904  | 6.983575  | 2.760331  |
| C | -0.497699 | 9.165797  | 1.949269  |
| C | -1.210159 | 10.258241 | 1.554298  |
| C | -1.355606 | 10.539732 | 0.184794  |
| C | -0.836317 | 9.694426  | -0.746891 |
| C | 0.414750  | 7.657786  | -1.338841 |
| C | 1.111301  | 6.546664  | -0.975142 |
| C | 1.380605  | 6.302027  | 0.385427  |
| C | 0.922676  | 7.155838  | 1.350619  |
| C | 0.121584  | 8.281635  | 1.020021  |
| C | -0.103403 | 8.546283  | -0.369384 |
| C | 0.052270  | 9.904210  | 4.249849  |
| C | -1.627182 | 8.162568  | 3.877216  |
| C | 0.993126  | 5.641491  | 3.293592  |
| C | 2.725984  | 7.346612  | 2.962385  |
| H | -1.636272 | 10.812718 | 2.164726  |
| H | -1.818080 | 11.269641 | -0.099504 |
| H | -0.943129 | 9.920552  | -1.671266 |
| H | 0.227260  | 7.884413  | -2.272353 |
| H | 1.443101  | 5.941659  | -1.652990 |
| H | 1.874895  | 5.496410  | 0.662008  |
| H | 0.874951  | 10.279086 | 3.939558  |
| H | 0.181808  | 9.538672  | 5.137671  |
| H | -0.636328 | 10.565914 | 4.288838  |
| H | -2.340778 | 8.811598  | 3.933466  |
| H | -1.931710 | 7.409147  | 3.269427  |
| H | -1.443101 | 7.772684  | 4.766053  |
| H | 1.590820  | 4.956107  | 2.891717  |
| H | 1.272656  | 5.648161  | 4.219795  |
| H | -0.022726 | 5.496410  | 3.123217  |
| H | 2.897565  | 8.336332  | 2.674432  |
| H | 3.408900  | 6.723763  | 2.522129  |
| H | 2.931654  | 7.314094  | 3.909097  |
| N | 5.296976  | -0.462592 | 16.933398 |
| H | 6.067842  | 0.336855  | 17.003051 |
| N | 6.985404  | 1.354425  | 17.546669 |
| C | 5.183801  | -0.827797 | 18.357731 |
| C | 4.471341  | -1.920241 | 18.752702 |
| C | 4.325894  | -2.201732 | 20.122206 |



|    |          |           |           |
|----|----------|-----------|-----------|
| C  | 4.845183 | -1.356426 | 21.053891 |
| C  | 6.096250 | 0.680214  | 21.645841 |
| C  | 6.792801 | 1.791336  | 21.282142 |
| C  | 7.062105 | 2.035973  | 19.921573 |
| C  | 6.604176 | 1.182162  | 18.956381 |
| C  | 5.803084 | 0.056365  | 19.286979 |
| C  | 5.578097 | -0.208283 | 20.676384 |
| C  | 5.733770 | -1.566210 | 16.057151 |
| C  | 4.054318 | 0.175432  | 16.429784 |
| C  | 6.674626 | 2.696509  | 17.013408 |
| C  | 8.407484 | 0.991388  | 17.344615 |
| H  | 4.045228 | -2.474718 | 18.142274 |
| H  | 3.863420 | -2.931641 | 20.406504 |
| H  | 4.738371 | -1.582552 | 21.978266 |
| H  | 5.908760 | 0.453587  | 22.579353 |
| H  | 7.124601 | 2.396341  | 21.959990 |
| H  | 7.556395 | 2.841590  | 19.644992 |
| H  | 6.556451 | -1.941086 | 16.367442 |
| H  | 5.863308 | -1.200672 | 15.169329 |
| H  | 5.045172 | -2.227914 | 16.018162 |
| H  | 3.340722 | -0.473598 | 16.373534 |
| H  | 3.749790 | 0.928853  | 17.037573 |
| H  | 4.238399 | 0.565316  | 15.540947 |
| H  | 7.272320 | 3.381893  | 17.415283 |
| H  | 6.954156 | 2.689839  | 16.087205 |
| H  | 5.658774 | 2.841590  | 17.183783 |
| H  | 8.579065 | 0.001668  | 17.632568 |
| H  | 9.090400 | 1.614237  | 17.784871 |
| H  | 8.613154 | 1.023906  | 16.397902 |
| O  | 9.100172 | 3.940205  | 4.941708  |
| C  | 7.816608 | 3.867331  | 5.105586  |
| C  | 7.032561 | 4.951771  | 5.561478  |
| C  | 5.655365 | 4.899075  | 5.684132  |
| C  | 4.973926 | 3.721249  | 5.393742  |
| C  | 5.705362 | 2.604458  | 5.005472  |
| C  | 7.079149 | 2.686504  | 4.845047  |
| Cl | 7.878763 | 6.409421  | 5.969649  |
| Cl | 4.761665 | 6.297858  | 6.165408  |
| Cl | 3.248795 | 3.652044  | 5.514772  |
| Cl | 4.894612 | 1.097614  | 4.770520  |

|    |           |           |           |
|----|-----------|-----------|-----------|
| Cl | 7.986144  | 1.308566  | 4.317471  |
| O  | 3.418672  | 4.397795  | 15.365292 |
| C  | 2.135108  | 4.470669  | 15.201414 |
| C  | 1.351061  | 3.386229  | 14.745522 |
| C  | -0.026135 | 3.438925  | 14.622868 |
| C  | -0.707574 | 4.616751  | 14.913258 |
| C  | 0.023862  | 5.733542  | 15.301528 |
| C  | 1.397649  | 5.651496  | 15.461953 |
| Cl | 2.197263  | 1.928579  | 14.337351 |
| Cl | -0.919835 | 2.040142  | 14.141592 |
| Cl | -2.432705 | 4.685956  | 14.792228 |
| Cl | -0.786888 | 7.240386  | 15.536480 |
| Cl | 2.304644  | 7.029434  | 15.989529 |
| O  | 2.262828  | 12.278205 | 5.211792  |
| C  | 3.546392  | 12.205331 | 5.047914  |
| C  | 4.330439  | 13.289771 | 4.592022  |
| C  | 5.707635  | 13.237075 | 4.469368  |
| C  | 6.389074  | 12.059249 | 4.759758  |
| C  | 5.657638  | 10.942458 | 5.148028  |
| C  | 4.283851  | 11.024504 | 5.308453  |
| Cl | 3.484237  | 14.747421 | 4.183851  |
| Cl | 6.601335  | 14.635858 | 3.988092  |
| Cl | 8.114205  | 11.990044 | 4.638728  |
| Cl | 6.468388  | 9.435614  | 5.382980  |
| Cl | 3.376856  | 9.646566  | 5.836029  |
| O  | 7.944328  | 12.735795 | 15.095208 |
| C  | 9.227892  | 12.808669 | 15.259086 |
| C  | 10.011939 | 11.724229 | 15.714978 |
| C  | 11.389135 | 11.776925 | 15.837632 |
| C  | 12.070574 | 12.954751 | 15.547242 |
| C  | 11.339138 | 14.071542 | 15.158972 |
| C  | 9.965351  | 13.989496 | 14.998547 |
| Cl | 9.165737  | 10.266579 | 16.123149 |
| Cl | 12.282835 | 10.378142 | 16.318908 |
| Cl | 13.795705 | 13.023956 | 15.668272 |
| Cl | 12.149888 | 15.578386 | 14.924020 |
| Cl | 9.058356  | 15.367434 | 14.470971 |
| O  | 10.845529 | 2.822413  | 3.274504  |
| H  | 10.181248 | 3.176778  | 3.529357  |
| C  | 11.016429 | 2.765214  | 1.948863  |

|    |           |           |           |
|----|-----------|-----------|-----------|
| C  | 10.302832 | 3.529475  | 1.023473  |
| C  | 10.580089 | 3.437257  | -0.343594 |
| C  | 11.534581 | 2.546258  | -0.803954 |
| C  | 12.252723 | 1.782831  | 0.107424  |
| C  | 12.019781 | 1.914572  | 1.466572  |
| Cl | 9.094150  | 4.601075  | 1.616640  |
| Cl | 9.729228  | 4.458495  | -1.451747 |
| Cl | 11.841155 | 2.399343  | -2.498979 |
| Cl | 13.423907 | 0.642360  | -0.446145 |
| Cl | 12.970524 | 1.040249  | 2.607825  |
| O  | 5.164029  | 5.515587  | 17.032496 |
| H  | 4.499748  | 5.161222  | 16.777643 |
| C  | 5.334929  | 5.572786  | 18.358137 |
| C  | 4.621332  | 4.808525  | 19.283527 |
| C  | 4.898589  | 4.900743  | 20.650594 |
| C  | 5.853081  | 5.791742  | 21.110954 |
| C  | 6.571223  | 6.555169  | 20.199576 |
| C  | 6.338281  | 6.423428  | 18.840428 |
| Cl | 3.412650  | 3.736925  | 18.690360 |
| Cl | 4.047728  | 3.879505  | 21.758747 |
| Cl | 6.159655  | 5.938657  | 22.805979 |
| Cl | 7.742407  | 7.695640  | 20.753145 |
| Cl | 7.289024  | 7.297751  | 17.699175 |
| O  | 0.517471  | 11.160413 | 6.878996  |
| H  | 1.181752  | 11.514778 | 6.624143  |
| C  | 0.346572  | 11.103214 | 8.204637  |
| C  | 1.060168  | 11.867475 | 9.130027  |
| C  | 0.782911  | 11.775257 | 10.497094 |
| C  | -0.171581 | 10.884258 | 10.957454 |
| C  | -0.889723 | 10.120831 | 10.046076 |
| C  | -0.656781 | 10.252572 | 8.686928  |
| Cl | 2.268850  | 12.939075 | 8.536860  |
| Cl | 1.633772  | 12.796495 | 11.605247 |
| Cl | -0.478155 | 10.737343 | 12.652479 |
| Cl | -2.060907 | 8.980360  | 10.599645 |
| Cl | -1.607524 | 9.378249  | 7.545675  |
| O  | 6.198971  | 13.853587 | 13.428004 |
| H  | 6.863252  | 13.499222 | 13.682857 |
| C  | 6.028072  | 13.910786 | 12.102363 |
| C  | 6.741668  | 13.146525 | 11.176973 |

|    |           |           |           |
|----|-----------|-----------|-----------|
| C  | 6.464411  | 13.238743 | 9.809906  |
| C  | 5.509919  | 14.129742 | 9.349546  |
| C  | 4.791777  | 14.893169 | 10.260924 |
| C  | 5.024719  | 14.761428 | 11.620072 |
| Cl | 7.950350  | 12.074925 | 11.770140 |
| Cl | 7.315272  | 12.217505 | 8.701753  |
| Cl | 5.203345  | 14.276657 | 7.654521  |
| Cl | 3.620593  | 16.033640 | 9.707355  |
| Cl | 4.073976  | 15.635751 | 12.761325 |
| C  | 11.010747 | 5.356498  | 7.638478  |
| O  | 10.893367 | 5.101689  | 6.339033  |
| H  | 10.203974 | 4.754328  | 6.083977  |
| C  | 11.932286 | 6.346719  | 8.021671  |
| C  | 12.170909 | 6.649722  | 9.353404  |
| C  | 11.492538 | 5.968007  | 10.357585 |
| C  | 10.574408 | 4.983956  | 10.009930 |
| C  | 10.317604 | 4.697129  | 8.671089  |
| Cl | 12.755990 | 7.197028  | 6.766902  |
| Cl | 13.319709 | 7.871072  | 9.756295  |
| Cl | 11.753660 | 6.363728  | 12.016464 |
| Cl | 9.780248  | 4.080617  | 11.243986 |
| Cl | 9.134375  | 3.518136  | 8.242408  |
| C  | 5.329247  | 2.981502  | 12.668522 |
| O  | 5.211867  | 3.236311  | 13.967967 |
| H  | 4.522474  | 3.583672  | 14.223023 |
| C  | 6.250786  | 1.991281  | 12.285329 |
| C  | 6.489409  | 1.688278  | 10.953596 |
| C  | 5.811038  | 2.369993  | 9.949415  |
| C  | 4.892908  | 3.354044  | 10.297070 |
| C  | 4.636104  | 3.640871  | 11.635911 |
| Cl | 7.074490  | 1.140972  | 13.540098 |
| Cl | 7.638209  | 0.466928  | 10.550705 |
| Cl | 6.072160  | 1.974272  | 8.290536  |
| Cl | 4.098748  | 4.257383  | 9.063014  |
| Cl | 3.452875  | 4.819864  | 12.064592 |
| C  | 0.352253  | 13.694498 | 2.515022  |
| O  | 0.469633  | 13.439689 | 3.814467  |
| H  | 1.159026  | 13.092328 | 4.069523  |
| C  | -0.569286 | 14.684719 | 2.131829  |
| C  | -0.807909 | 14.987722 | 0.800096  |

|    |           |           |           |
|----|-----------|-----------|-----------|
| C  | -0.129538 | 14.306007 | -0.204085 |
| C  | 0.788592  | 13.321956 | 0.143570  |
| C  | 1.045396  | 13.035129 | 1.482411  |
| Cl | -1.392990 | 15.535028 | 3.386598  |
| Cl | -1.956709 | 16.209072 | 0.397205  |
| Cl | -0.390660 | 14.701728 | -1.862964 |
| Cl | 1.582752  | 12.418617 | -1.090486 |
| Cl | 2.228625  | 11.856136 | 1.911092  |
| C  | 6.033753  | 11.319502 | 17.791978 |
| O  | 6.151133  | 11.574311 | 16.492533 |
| H  | 6.840526  | 11.921672 | 16.237477 |
| C  | 5.112214  | 10.329281 | 18.175171 |
| C  | 4.873591  | 10.026278 | 19.506904 |
| C  | 5.551962  | 10.707993 | 20.511085 |
| C  | 6.470092  | 11.692044 | 20.163430 |
| C  | 6.726896  | 11.978871 | 18.824589 |
| Cl | 4.288510  | 9.478972  | 16.920402 |
| Cl | 3.724791  | 8.804928  | 19.909795 |
| Cl | 5.290840  | 10.312272 | 22.169964 |
| Cl | 7.264252  | 12.595383 | 21.397486 |
| Cl | 7.910125  | 13.157864 | 18.395908 |

## Compound (2) CCDC identifiers: RISBEA (122006)

### XYZ for single molecule:

43

odorf4

|   |          |          |           |
|---|----------|----------|-----------|
| C | 4.108741 | 2.852500 | 9.664674  |
| C | 5.266856 | 2.852500 | 8.987372  |
| C | 5.281689 | 2.852500 | 7.578952  |
| C | 4.104177 | 2.852500 | 6.888525  |
| C | 2.852500 | 2.852500 | 7.560576  |
| C | 2.852500 | 2.852500 | 9.009686  |
| N | 4.128138 | 2.852500 | 11.136098 |
| O | 4.050550 | 2.852500 | 5.531296  |
| C | 4.744278 | 1.631630 | 11.690016 |
| C | 5.280548 | 2.852500 | 4.810679  |
| H | 2.852500 | 2.852500 | 11.248982 |
| H | 6.138580 | 2.852500 | 9.490098  |
| H | 6.195630 | 2.852500 | 7.061788  |
| H | 4.643870 | 1.540350 | 12.600960 |

|   |           |          |           |
|---|-----------|----------|-----------|
| H | 4.153240  | 0.855750 | 11.445872 |
| H | 5.796280  | 1.506120 | 11.590258 |
| H | 5.921790  | 1.939700 | 5.119140  |
| H | 5.100270  | 2.852500 | 3.977178  |
| C | 1.596259  | 2.852500 | 9.664674  |
| C | 0.438144  | 2.852500 | 8.987372  |
| C | 0.423311  | 2.852500 | 7.578952  |
| C | 1.600823  | 2.852500 | 6.888525  |
| N | 1.576862  | 2.852500 | 11.136098 |
| O | 1.654450  | 2.852500 | 5.531296  |
| C | 0.960722  | 4.073370 | 11.690016 |
| C | 0.424452  | 2.852500 | 4.810679  |
| H | -0.433580 | 2.852500 | 9.490098  |
| H | -0.490630 | 2.852500 | 7.061788  |
| H | 1.061130  | 4.164650 | 12.600960 |
| H | 1.551760  | 4.849250 | 11.445872 |
| H | -0.091280 | 4.198880 | 11.590258 |
| H | -0.216790 | 3.765300 | 5.119140  |
| H | 0.604730  | 2.852500 | 3.977178  |
| C | 4.744278  | 4.073370 | 11.690016 |
| H | 4.643870  | 4.164650 | 12.600960 |
| H | 4.153240  | 4.849250 | 11.445872 |
| H | 5.796280  | 4.198880 | 11.590258 |
| H | 5.921790  | 3.765300 | 5.119140  |
| C | 0.960722  | 1.631630 | 11.690016 |
| H | 1.061130  | 1.540350 | 12.600960 |
| H | 1.551760  | 0.855750 | 11.445872 |
| H | -0.091280 | 1.506120 | 11.590258 |
| H | -0.216790 | 1.939700 | 5.119140  |

### XYZ for crystal:

132

odorf4

|    |          |          |           |
|----|----------|----------|-----------|
| Br | 2.852500 | 2.852500 | 1.702442  |
| Br | 8.557500 | 2.852500 | 11.423558 |
| Br | 2.852500 | 8.557500 | 11.423558 |
| C  | 4.108741 | 2.852500 | 9.664674  |
| C  | 5.266856 | 2.852500 | 8.987372  |
| C  | 5.281689 | 2.852500 | 7.578952  |
| C  | 4.104177 | 2.852500 | 6.888525  |

|   |           |          |           |
|---|-----------|----------|-----------|
| C | 2.852500  | 2.852500 | 7.560576  |
| C | 2.852500  | 2.852500 | 9.009686  |
| N | 4.128138  | 2.852500 | 11.136098 |
| O | 4.050550  | 2.852500 | 5.531296  |
| C | 4.744278  | 1.631630 | 11.690016 |
| C | 5.280548  | 2.852500 | 4.810679  |
| H | 2.852500  | 2.852500 | 11.248982 |
| H | 6.138580  | 2.852500 | 9.490098  |
| H | 6.195630  | 2.852500 | 7.061788  |
| H | 4.643870  | 1.540350 | 12.600960 |
| H | 4.153240  | 0.855750 | 11.445872 |
| H | 5.796280  | 1.506120 | 11.590258 |
| H | 5.921790  | 1.939700 | 5.119140  |
| H | 5.100270  | 2.852500 | 3.977178  |
| C | 1.596259  | 2.852500 | 9.664674  |
| C | 0.438144  | 2.852500 | 8.987372  |
| C | 0.423311  | 2.852500 | 7.578952  |
| C | 1.600823  | 2.852500 | 6.888525  |
| N | 1.576862  | 2.852500 | 11.136098 |
| O | 1.654450  | 2.852500 | 5.531296  |
| C | 0.960722  | 4.073370 | 11.690016 |
| C | 0.424452  | 2.852500 | 4.810679  |
| H | -0.433580 | 2.852500 | 9.490098  |
| H | -0.490630 | 2.852500 | 7.061788  |
| H | 1.061130  | 4.164650 | 12.600960 |
| H | 1.551760  | 4.849250 | 11.445872 |
| H | -0.091280 | 4.198880 | 11.590258 |
| H | -0.216790 | 3.765300 | 5.119140  |
| H | 0.604730  | 2.852500 | 3.977178  |
| C | 4.744278  | 4.073370 | 11.690016 |
| H | 4.643870  | 4.164650 | 12.600960 |
| H | 4.153240  | 4.849250 | 11.445872 |
| H | 5.796280  | 4.198880 | 11.590258 |
| H | 5.921790  | 3.765300 | 5.119140  |
| C | 0.960722  | 1.631630 | 11.690016 |
| H | 1.061130  | 1.540350 | 12.600960 |
| H | 1.551760  | 0.855750 | 11.445872 |
| H | -0.091280 | 1.506120 | 11.590258 |
| H | -0.216790 | 1.939700 | 5.119140  |
| C | 8.557500  | 4.108741 | 3.461326  |

|   |           |           |          |
|---|-----------|-----------|----------|
| C | 8.557500  | 5.266856  | 4.138628 |
| C | 8.557500  | 5.281689  | 5.547048 |
| C | 8.557500  | 4.104177  | 6.237475 |
| C | 8.557500  | 2.852500  | 5.565424 |
| C | 8.557500  | 2.852500  | 4.116314 |
| N | 8.557500  | 4.128138  | 1.989902 |
| O | 8.557500  | 4.050550  | 7.594704 |
| C | 9.778370  | 4.744278  | 1.435984 |
| C | 8.557500  | 5.280548  | 8.315321 |
| H | 8.557500  | 2.852500  | 1.877018 |
| H | 8.557500  | 6.138580  | 3.635902 |
| H | 8.557500  | 6.195630  | 6.064212 |
| H | 9.869650  | 4.643870  | 0.525040 |
| H | 10.554250 | 4.153240  | 1.680128 |
| H | 9.903880  | 5.796280  | 1.535742 |
| H | 9.470300  | 5.921790  | 8.006860 |
| H | 8.557500  | 5.100270  | 9.148822 |
| C | 8.557500  | 1.596259  | 3.461326 |
| C | 8.557500  | 0.438144  | 4.138628 |
| C | 8.557500  | 0.423311  | 5.547048 |
| C | 8.557500  | 1.600823  | 6.237475 |
| N | 8.557500  | 1.576862  | 1.989902 |
| O | 8.557500  | 1.654450  | 7.594704 |
| C | 7.336630  | 0.960722  | 1.435984 |
| C | 8.557500  | 0.424452  | 8.315321 |
| H | 8.557500  | -0.433580 | 3.635902 |
| H | 8.557500  | -0.490630 | 6.064212 |
| H | 7.245350  | 1.061130  | 0.525040 |
| H | 6.560750  | 1.551760  | 1.680128 |
| H | 7.211120  | -0.091280 | 1.535742 |
| H | 7.644700  | -0.216790 | 8.006860 |
| H | 8.557500  | 0.604730  | 9.148822 |
| C | 7.336630  | 4.744278  | 1.435984 |
| H | 7.245350  | 4.643870  | 0.525040 |
| H | 6.560750  | 4.153240  | 1.680128 |
| H | 7.211120  | 5.796280  | 1.535742 |
| H | 7.644700  | 5.921790  | 8.006860 |
| C | 9.778370  | 0.960722  | 1.435984 |
| H | 9.869650  | 1.061130  | 0.525040 |
| H | 10.554250 | 1.551760  | 1.680128 |



|   |          |           |          |
|---|----------|-----------|----------|
| H | 9.903880 | -0.091280 | 1.535742 |
| H | 9.470300 | -0.216790 | 8.006860 |
| C | 2.852500 | 7.301259  | 3.461326 |
| C | 2.852500 | 6.143144  | 4.138628 |
| C | 2.852500 | 6.128311  | 5.547048 |
| C | 2.852500 | 7.305823  | 6.237475 |
| C | 2.852500 | 8.557500  | 5.565424 |
| C | 2.852500 | 8.557500  | 4.116314 |
| N | 2.852500 | 7.281862  | 1.989902 |
| O | 2.852500 | 7.359450  | 7.594704 |
| C | 1.631630 | 6.665722  | 1.435984 |
| C | 2.852500 | 6.129452  | 8.315321 |
| H | 2.852500 | 8.557500  | 1.877018 |
| H | 2.852500 | 5.271420  | 3.635902 |
| H | 2.852500 | 5.214370  | 6.064212 |
| H | 1.540350 | 6.766130  | 0.525040 |
| H | 0.855750 | 7.256760  | 1.680128 |
| H | 1.506120 | 5.613720  | 1.535742 |
| H | 1.939700 | 5.488210  | 8.006860 |
| H | 2.852500 | 6.309730  | 9.148822 |
| C | 2.852500 | 9.813741  | 3.461326 |
| C | 2.852500 | 10.971856 | 4.138628 |
| C | 2.852500 | 10.986689 | 5.547048 |
| C | 2.852500 | 9.809177  | 6.237475 |
| N | 2.852500 | 9.833138  | 1.989902 |
| O | 2.852500 | 9.755550  | 7.594704 |
| C | 4.073370 | 10.449278 | 1.435984 |
| C | 2.852500 | 10.985548 | 8.315321 |
| H | 2.852500 | 11.843580 | 3.635902 |
| H | 2.852500 | 11.900630 | 6.064212 |
| H | 4.164650 | 10.348870 | 0.525040 |
| H | 4.849250 | 9.858240  | 1.680128 |
| H | 4.198880 | 11.501280 | 1.535742 |
| H | 3.765300 | 11.626790 | 8.006860 |
| H | 2.852500 | 10.805270 | 9.148822 |
| C | 4.073370 | 6.665722  | 1.435984 |
| H | 4.164650 | 6.766130  | 0.525040 |
| H | 4.849250 | 7.256760  | 1.680128 |
| H | 4.198880 | 5.613720  | 1.535742 |
| H | 3.765300 | 5.488210  | 8.006860 |

|   |          |           |          |
|---|----------|-----------|----------|
| C | 1.631630 | 10.449278 | 1.435984 |
| H | 1.540350 | 10.348870 | 0.525040 |
| H | 0.855750 | 9.858240  | 1.680128 |
| H | 1.506120 | 11.501280 | 1.535742 |
| H | 1.939700 | 11.626790 | 8.006860 |

**Compound (3) CCDC identifiers: XUCKAH (170012)**

**XYZ for single molecule:**

37

brom

|   |          |           |          |
|---|----------|-----------|----------|
| N | 6.868125 | -0.872809 | 7.632716 |
| N | 8.264594 | 0.976447  | 6.535100 |
| N | 4.820869 | 0.833660  | 2.052970 |
| C | 5.976222 | -0.893167 | 6.484306 |
| C | 4.912783 | -1.741490 | 6.438672 |
| H | 4.726012 | -2.294843 | 7.162677 |
| C | 4.104064 | -1.779785 | 5.304151 |
| H | 3.391371 | -2.375988 | 5.273794 |
| C | 4.333426 | -0.971038 | 4.246019 |
| H | 3.778545 | -1.022145 | 3.501974 |
| C | 5.656047 | 0.848750  | 3.145427 |
| C | 6.693551 | 1.712448  | 3.216260 |
| H | 6.846176 | 2.299114  | 2.509913 |
| C | 7.536921 | 1.743341  | 4.316456 |
| H | 8.253205 | 2.337551  | 4.321416 |
| C | 7.346926 | 0.931319  | 5.383714 |
| C | 6.264553 | 0.005694  | 5.398198 |
| C | 5.408362 | -0.043420 | 4.253956 |
| C | 6.190314 | -0.439892 | 8.891244 |
| H | 6.835930 | -0.384372 | 9.599178 |
| H | 5.512297 | -1.077665 | 9.124973 |
| H | 5.787323 | 0.421386  | 8.757911 |
| C | 7.576674 | -2.163730 | 7.790652 |
| H | 8.180658 | -2.108352 | 8.535689 |
| H | 8.071697 | -2.357482 | 6.990059 |
| H | 6.937363 | -2.862860 | 7.948389 |
| C | 8.256635 | 2.295270  | 7.249780 |
| H | 8.837713 | 2.249288  | 8.011881 |
| H | 7.364048 | 2.496994  | 7.539660 |
| H | 8.563919 | 2.983866  | 6.654742 |

|   |           |           |          |
|---|-----------|-----------|----------|
| C | 9.639365  | 0.538121  | 6.174982 |
| H | 10.172490 | 0.468364  | 6.970218 |
| H | 10.035044 | 1.178741  | 5.579349 |
| H | 9.598763  | -0.317463 | 5.742047 |
| H | 7.561197  | -0.024201 | 7.329344 |
| H | 4.872382  | 1.383739  | 1.523805 |
| H | 4.208140  | 0.000000  | 1.914677 |

### XYZ for crystal:

342

brom

|    |           |           |           |
|----|-----------|-----------|-----------|
| Br | 4.110120  | 3.559427  | 19.659089 |
| Br | 4.174684  | 10.677427 | 10.102728 |
| Br | 5.140416  | 10.676573 | 0.182122  |
| Br | 5.075852  | 3.558573  | 9.738483  |
| Br | 0.000000  | 0.000000  | 0.000000  |
| Br | -1.931464 | 0.000000  | 19.841211 |
| Br | 0.000000  | 14.236000 | 0.000000  |
| Br | -1.931464 | 14.236000 | 19.841211 |
| Br | 11.182000 | 0.000000  | 0.000000  |
| Br | 9.250536  | 0.000000  | 19.841211 |
| Br | 11.182000 | 14.236000 | 0.000000  |
| Br | 9.250536  | 14.236000 | 19.841211 |
| Br | -0.965732 | 7.118000  | 9.920606  |
| Br | 10.216268 | 7.118000  | 9.920606  |
| Br | 0.000000  | 7.118000  | 0.000000  |
| Br | -1.931464 | 7.118000  | 19.841211 |
| Br | 11.182000 | 7.118000  | 0.000000  |
| Br | 9.250536  | 7.118000  | 19.841211 |
| Br | -0.965732 | 0.000000  | 9.920606  |
| Br | -0.965732 | 14.236000 | 9.920606  |
| Br | 10.216268 | 0.000000  | 9.920606  |
| Br | 10.216268 | 14.236000 | 9.920606  |
| O  | 2.807740  | 12.935114 | 1.310115  |
| H  | 3.370620  | 12.351154 | 0.765871  |
| H  | 1.995325  | 13.135557 | 0.684522  |
| O  | 7.408528  | 5.817114  | 8.610491  |
| H  | 6.845648  | 5.233154  | 9.154735  |
| H  | 8.220943  | 6.017557  | 9.236084  |
| O  | 6.442796  | 1.300886  | 18.531096 |

|   |           |           |           |
|---|-----------|-----------|-----------|
| H | 5.879917  | 1.884846  | 19.075341 |
| H | 7.255211  | 1.100443  | 19.156690 |
| O | 1.842009  | 8.418886  | 11.230721 |
| H | 2.404888  | 9.002846  | 10.686476 |
| H | 1.029593  | 8.218443  | 10.605128 |
| O | 8.593044  | 5.193578  | 1.381742  |
| H | 9.297527  | 5.613255  | 0.853172  |
| H | 8.190540  | 4.595381  | 0.680554  |
| O | 1.623224  | 12.311578 | 8.538864  |
| H | 0.918741  | 12.731255 | 9.067434  |
| H | 2.025729  | 11.713381 | 9.240052  |
| O | 0.657492  | 9.042422  | 18.459470 |
| H | -0.046991 | 8.622745  | 18.988039 |
| H | 1.059997  | 9.640619  | 19.160658 |
| O | 7.627312  | 1.924422  | 11.302348 |
| H | 8.331795  | 1.504745  | 10.773778 |
| H | 7.224808  | 2.522619  | 10.601159 |
| N | 6.868125  | -0.872809 | 7.632716  |
| N | 8.264594  | 0.976447  | 6.535100  |
| N | 4.820869  | 0.833660  | 2.052970  |
| C | 5.976222  | -0.893167 | 6.484306  |
| C | 4.912783  | -1.741490 | 6.438672  |
| H | 4.726012  | -2.294843 | 7.162677  |
| C | 4.104064  | -1.779785 | 5.304151  |
| H | 3.391371  | -2.375988 | 5.273794  |
| C | 4.333426  | -0.971038 | 4.246019  |
| H | 3.778545  | -1.022145 | 3.501974  |
| C | 5.656047  | 0.848750  | 3.145427  |
| C | 6.693551  | 1.712448  | 3.216260  |
| H | 6.846176  | 2.299114  | 2.509913  |
| C | 7.536921  | 1.743341  | 4.316456  |
| H | 8.253205  | 2.337551  | 4.321416  |
| C | 7.346926  | 0.931319  | 5.383714  |
| C | 6.264553  | 0.005694  | 5.398198  |
| C | 5.408362  | -0.043420 | 4.253956  |
| C | 6.190314  | -0.439892 | 8.891244  |
| H | 6.835930  | -0.384372 | 9.599178  |
| H | 5.512297  | -1.077665 | 9.124973  |
| H | 5.787323  | 0.421386  | 8.757911  |
| C | 7.576674  | -2.163730 | 7.790652  |

|   |           |           |          |
|---|-----------|-----------|----------|
| H | 8.180658  | -2.108352 | 8.535689 |
| H | 8.071697  | -2.357482 | 6.990059 |
| H | 6.937363  | -2.862860 | 7.948389 |
| C | 8.256635  | 2.295270  | 7.249780 |
| H | 8.837713  | 2.249288  | 8.011881 |
| H | 7.364048  | 2.496994  | 7.539660 |
| H | 8.563919  | 2.983866  | 6.654742 |
| C | 9.639365  | 0.538121  | 6.174982 |
| H | 10.172490 | 0.468364  | 6.970218 |
| H | 10.035044 | 1.178741  | 5.579349 |
| H | 9.598763  | -0.317463 | 5.742047 |
| H | 7.561197  | -0.024201 | 7.329344 |
| H | 4.872382  | 1.383739  | 1.523805 |
| H | 4.208140  | 0.000000  | 1.914677 |
| N | 3.348143  | 6.245191  | 2.287890 |
| N | 1.951674  | 8.094447  | 3.385506 |
| N | 5.395399  | 7.951660  | 7.867636 |
| C | 4.240046  | 6.224833  | 3.436299 |
| C | 5.303485  | 5.376510  | 3.481934 |
| H | 5.490257  | 4.823157  | 2.757928 |
| C | 6.112204  | 5.338215  | 4.616455 |
| H | 6.824897  | 4.742012  | 4.646812 |
| C | 5.882842  | 6.146962  | 5.674586 |
| H | 6.437723  | 6.095855  | 6.418632 |
| C | 4.560221  | 7.966750  | 6.775178 |
| C | 3.522717  | 8.830448  | 6.704345 |
| H | 3.370092  | 9.417114  | 7.410692 |
| C | 2.679347  | 8.861341  | 5.604150 |
| H | 1.963064  | 9.455551  | 5.599190 |
| C | 2.869342  | 8.049319  | 4.536891 |
| C | 3.951716  | 7.123694  | 4.522407 |
| C | 4.807907  | 7.074580  | 5.666650 |
| C | 4.025954  | 6.678108  | 1.029362 |
| H | 3.380338  | 6.733628  | 0.321428 |
| H | 4.703972  | 6.040335  | 0.795633 |
| H | 4.428945  | 7.539386  | 1.162695 |
| C | 2.639595  | 4.954270  | 2.129954 |
| H | 2.035610  | 5.009648  | 1.384917 |
| H | 2.144571  | 4.760518  | 2.930547 |
| H | 3.278905  | 4.255140  | 1.972216 |

|   |          |           |           |
|---|----------|-----------|-----------|
| C | 1.959633 | 9.413270  | 2.670825  |
| H | 1.378555 | 9.367288  | 1.908725  |
| H | 2.852220 | 9.614994  | 2.380945  |
| H | 1.652349 | 10.101866 | 3.265863  |
| C | 0.576903 | 7.656121  | 3.745624  |
| H | 0.043779 | 7.586364  | 2.950388  |
| H | 0.181224 | 8.296741  | 4.341257  |
| H | 0.617505 | 6.800537  | 4.178559  |
| H | 2.655071 | 7.093799  | 2.591262  |
| H | 5.343887 | 8.501739  | 8.396801  |
| H | 6.008128 | 7.118000  | 8.005929  |
| N | 2.382411 | 15.108809 | 12.208496 |
| N | 0.985942 | 13.259553 | 13.306112 |
| N | 4.429667 | 13.402340 | 17.788241 |
| C | 3.274314 | 15.129167 | 13.356905 |
| C | 4.337753 | 15.977490 | 13.402540 |
| H | 4.524525 | 16.530843 | 12.678534 |
| C | 5.146472 | 16.015785 | 14.537060 |
| H | 5.859165 | 16.611988 | 14.567417 |
| C | 4.917110 | 15.207038 | 15.595192 |
| H | 5.471991 | 15.258145 | 16.339238 |
| C | 3.594489 | 13.387250 | 16.695784 |
| C | 2.556985 | 12.523552 | 16.624951 |
| H | 2.404360 | 11.936886 | 17.331298 |
| C | 1.713615 | 12.492659 | 15.524756 |
| H | 0.997332 | 11.898449 | 15.519796 |
| C | 1.903610 | 13.304681 | 14.457497 |
| C | 2.985984 | 14.230306 | 14.443013 |
| C | 3.842175 | 14.279420 | 15.587256 |
| C | 3.060222 | 14.675892 | 10.949968 |
| H | 2.414607 | 14.620372 | 10.242033 |
| H | 3.738240 | 15.313665 | 10.716238 |
| H | 3.463213 | 13.814614 | 11.083301 |
| C | 1.673863 | 16.399730 | 12.050560 |
| H | 1.069878 | 16.344352 | 11.305522 |
| H | 1.178839 | 16.593482 | 12.851153 |
| H | 2.313173 | 17.098860 | 11.892822 |
| C | 0.993901 | 11.940730 | 12.591431 |
| H | 0.412823 | 11.986712 | 11.829330 |
| H | 1.886488 | 11.739006 | 12.301551 |

|   |           |           |           |
|---|-----------|-----------|-----------|
| H | 0.686618  | 11.252134 | 13.186469 |
| C | -0.388829 | 13.697879 | 13.666230 |
| H | -0.921953 | 13.767636 | 12.870994 |
| H | -0.784508 | 13.057259 | 14.261863 |
| H | -0.348227 | 14.553463 | 14.099165 |
| H | 1.689339  | 14.260201 | 12.511868 |
| H | 4.378155  | 12.852261 | 18.317406 |
| H | 5.042396  | 14.236000 | 17.926535 |
| N | 5.902393  | 7.990809  | 17.553321 |
| N | 7.298862  | 6.141553  | 16.455706 |
| N | 3.855138  | 6.284340  | 11.973576 |
| C | 5.010490  | 8.011167  | 16.404912 |
| C | 3.947052  | 8.859490  | 16.359277 |
| H | 3.760280  | 9.412843  | 17.083283 |
| C | 3.138332  | 8.897785  | 15.224757 |
| H | 2.425639  | 9.493988  | 15.194400 |
| C | 3.367694  | 8.089038  | 14.166625 |
| H | 2.812814  | 8.140145  | 13.422580 |
| C | 4.690316  | 6.269250  | 13.066033 |
| C | 5.727819  | 5.405552  | 13.136866 |
| H | 5.880444  | 4.818886  | 12.430519 |
| C | 6.571189  | 5.374659  | 14.237061 |
| H | 7.287473  | 4.780449  | 14.242022 |
| C | 6.381195  | 6.186681  | 15.304320 |
| C | 5.298821  | 7.112306  | 15.318804 |
| C | 4.442630  | 7.161420  | 14.174561 |
| C | 5.224583  | 7.557892  | 18.811849 |
| H | 5.870198  | 7.502372  | 19.519784 |
| H | 4.546565  | 8.195665  | 19.045579 |
| H | 4.821592  | 6.696614  | 18.678516 |
| C | 6.610942  | 9.281730  | 17.711257 |
| H | 7.214926  | 9.226352  | 18.456295 |
| H | 7.105965  | 9.475482  | 16.910665 |
| H | 5.971631  | 9.980860  | 17.868995 |
| C | 7.290904  | 4.822730  | 17.170386 |
| H | 7.871981  | 4.868712  | 17.932487 |
| H | 6.398316  | 4.621006  | 17.460266 |
| H | 7.598187  | 4.134134  | 16.575348 |
| C | 8.673634  | 6.579879  | 16.095588 |
| H | 9.206758  | 6.649636  | 16.890823 |

|   |           |          |           |
|---|-----------|----------|-----------|
| H | 9.069312  | 5.939259 | 15.499954 |
| H | 8.633031  | 7.435463 | 15.662652 |
| H | 6.595465  | 7.142201 | 17.249949 |
| H | 3.906650  | 5.734261 | 11.444411 |
| H | 3.242408  | 7.118000 | 11.835283 |
| N | 1.395501  | 4.416007 | 7.694025  |
| N | 2.732783  | 2.590525 | 6.502560  |
| N | -0.861841 | 2.820294 | 2.156541  |
| C | 0.471159  | 4.468538 | 6.543433  |
| C | -0.563698 | 5.344906 | 6.548790  |
| H | -0.694117 | 5.903669 | 7.279740  |
| C | -1.434003 | 5.410961 | 5.461095  |
| H | -2.152238 | 6.001898 | 5.476174  |
| C | -1.233479 | 4.610756 | 4.377566  |
| H | -1.801761 | 4.685068 | 3.644831  |
| C | 0.003920  | 2.796520 | 3.210506  |
| C | 1.041529  | 1.895950 | 3.234316  |
| H | 1.157120  | 1.313983 | 2.517850  |
| C | 1.920956  | 1.840430 | 4.308717  |
| H | 2.620760  | 1.228567 | 4.287686  |
| C | 1.787543  | 2.653733 | 5.392048  |
| C | 0.715911  | 3.594305 | 5.453555  |
| C | -0.183329 | 3.672461 | 4.341455  |
| C | 0.758921  | 3.910629 | 8.928744  |
| H | 0.071044  | 4.519930 | 9.206322  |
| H | 1.419481  | 3.836602 | 9.621003  |
| H | 0.372806  | 3.047928 | 8.759895  |
| C | 2.109887  | 5.696962 | 7.916048  |
| H | 2.813603  | 5.564852 | 8.555530  |
| H | 1.493680  | 6.353527 | 8.249976  |
| H | 2.484651  | 6.001898 | 7.087281  |
| C | 2.762027  | 1.288927 | 7.167042  |
| H | 3.290292  | 1.349573 | 7.966246  |
| H | 3.148181  | 0.637773 | 6.577362  |
| H | 1.867851  | 1.024992 | 7.392835  |
| C | 4.089137  | 3.025150 | 6.089268  |
| H | 4.459293  | 2.383106 | 5.480143  |
| H | 4.653420  | 3.093483 | 6.863075  |
| H | 4.032841  | 3.880734 | 5.656729  |
| H | 1.904416  | 3.687124 | 7.545613  |



|   |           |           |           |
|---|-----------|-----------|-----------|
| H | -0.882272 | 2.049984  | 1.367059  |
| H | -1.369767 | 3.581778  | 2.009915  |
| N | 8.820767  | 11.534007 | 2.226581  |
| N | 7.483485  | 9.708525  | 3.418045  |
| N | 11.078110 | 9.938294  | 7.764064  |
| C | 9.745109  | 11.586538 | 3.377173  |
| C | 10.779966 | 12.462906 | 3.371815  |
| H | 10.910386 | 13.021669 | 2.640865  |
| C | 11.650272 | 12.528961 | 4.459511  |
| H | 12.368506 | 13.119898 | 4.444431  |
| C | 11.449747 | 11.728756 | 5.543039  |
| H | 12.018029 | 11.803068 | 6.275775  |
| C | 10.212348 | 9.914520  | 6.710099  |
| C | 9.174739  | 9.013950  | 6.686290  |
| H | 9.059148  | 8.431983  | 7.402756  |
| C | 8.295312  | 8.958430  | 5.611888  |
| H | 7.595508  | 8.346567  | 5.632920  |
| C | 8.428725  | 9.771733  | 4.528558  |
| C | 9.500357  | 10.712305 | 4.467050  |
| C | 10.399597 | 10.790461 | 5.579150  |
| C | 9.457347  | 11.028629 | 0.991862  |
| H | 10.145224 | 11.637930 | 0.714284  |
| H | 8.796787  | 10.954602 | 0.299602  |
| H | 9.843462  | 10.165928 | 1.160711  |
| C | 8.106381  | 12.814962 | 2.004558  |
| H | 7.402665  | 12.682852 | 1.365075  |
| H | 8.722588  | 13.471527 | 1.670630  |
| H | 7.731617  | 13.119898 | 2.833325  |
| C | 7.454241  | 8.406927  | 2.753563  |
| H | 6.925976  | 8.467573  | 1.954359  |
| H | 7.068087  | 7.755773  | 3.343244  |
| H | 8.348417  | 8.142992  | 2.527770  |
| C | 6.127131  | 10.143150 | 3.831338  |
| H | 5.756975  | 9.501106  | 4.440463  |
| H | 5.562848  | 10.211483 | 3.057531  |
| H | 6.183427  | 10.998734 | 4.263876  |
| H | 8.311852  | 10.805124 | 2.374993  |
| H | 11.098540 | 9.167984  | 8.553546  |
| H | 11.586035 | 10.699778 | 7.910691  |
| N | 7.855035  | 9.819993  | 12.147186 |

|   |           |           |           |
|---|-----------|-----------|-----------|
| N | 6.517753  | 11.645475 | 13.338651 |
| N | 10.112378 | 11.415706 | 17.684670 |
| C | 8.779377  | 9.767462  | 13.297778 |
| C | 9.814234  | 8.891094  | 13.292421 |
| H | 9.944654  | 8.332331  | 12.561471 |
| C | 10.684540 | 8.825039  | 14.380116 |
| H | 11.402774 | 8.234102  | 14.365037 |
| C | 10.484015 | 9.625244  | 15.463645 |
| H | 11.052297 | 9.550932  | 16.196381 |
| C | 9.246616  | 11.439480 | 16.630705 |
| C | 8.209008  | 12.340050 | 16.606896 |
| H | 8.093416  | 12.922017 | 17.323362 |
| C | 7.329580  | 12.395570 | 15.532494 |
| H | 6.629776  | 13.007433 | 15.553526 |
| C | 7.462993  | 11.582267 | 14.449164 |
| C | 8.534625  | 10.641695 | 14.387656 |
| C | 9.433865  | 10.563539 | 15.499756 |
| C | 8.491615  | 10.325371 | 10.912468 |
| H | 9.179492  | 9.716070  | 10.634889 |
| H | 7.831056  | 10.399398 | 10.220208 |
| H | 8.877730  | 11.188072 | 11.081317 |
| C | 7.140649  | 8.539038  | 11.925163 |
| H | 6.436933  | 8.671148  | 11.285681 |
| H | 7.756856  | 7.882473  | 11.591236 |
| H | 6.765885  | 8.234102  | 12.753931 |
| C | 6.488509  | 12.947073 | 12.674169 |
| H | 5.960244  | 12.886427 | 11.874965 |
| H | 6.102355  | 13.598227 | 13.263850 |
| H | 7.382685  | 13.211008 | 12.448376 |
| C | 5.161399  | 11.210850 | 13.751944 |
| H | 4.791244  | 11.852894 | 14.361069 |
| H | 4.597116  | 11.142517 | 12.978136 |
| H | 5.217695  | 10.355266 | 14.184482 |
| H | 7.346120  | 10.548876 | 12.295599 |
| H | 10.132808 | 12.186016 | 18.474152 |
| H | 10.620303 | 10.654222 | 17.831297 |
| N | 0.429769  | 2.701993  | 17.614631 |
| N | 1.767051  | 4.527475  | 16.423166 |
| N | -1.827573 | 4.297706  | 12.077147 |
| C | -0.494573 | 2.649462  | 16.464039 |

|   |           |          |           |
|---|-----------|----------|-----------|
| C | -1.529430 | 1.773094 | 16.469396 |
| H | -1.659849 | 1.214331 | 17.200346 |
| C | -2.399735 | 1.707039 | 15.381701 |
| H | -3.117970 | 1.116102 | 15.396780 |
| C | -2.199211 | 2.507244 | 14.298172 |
| H | -2.767493 | 2.432932 | 13.565436 |
| C | -0.961811 | 4.321480 | 13.131112 |
| C | 0.075797  | 5.222050 | 13.154922 |
| H | 0.191388  | 5.804017 | 12.438455 |
| C | 0.955224  | 5.277570 | 14.229323 |
| H | 1.655028  | 5.889433 | 14.208292 |
| C | 0.821811  | 4.464267 | 15.312653 |
| C | -0.249821 | 3.523695 | 15.374161 |
| C | -1.149061 | 3.445539 | 14.262061 |
| C | -0.206811 | 3.207371 | 18.849349 |
| H | -0.894688 | 2.598070 | 19.126928 |
| H | 0.453749  | 3.281398 | 19.541609 |
| H | -0.592926 | 4.070072 | 18.680501 |
| C | 1.144155  | 1.421038 | 17.836654 |
| H | 1.847871  | 1.553148 | 18.476136 |
| H | 0.527948  | 0.764473 | 18.170581 |
| H | 1.518919  | 1.116102 | 17.007886 |
| C | 1.796296  | 5.829073 | 17.087648 |
| H | 2.324561  | 5.768427 | 17.886852 |
| H | 2.182449  | 6.480227 | 16.497967 |
| H | 0.902119  | 6.093008 | 17.313441 |
| C | 3.123405  | 4.092850 | 16.009874 |
| H | 3.493561  | 4.734894 | 15.400748 |
| H | 3.687689  | 4.024517 | 16.783681 |
| H | 3.067110  | 3.237266 | 15.577335 |
| H | 0.938684  | 3.430876 | 17.466218 |
| H | -1.848004 | 5.068016 | 11.287665 |
| H | -2.335499 | 3.536222 | 11.930520 |

**Compound (4) CCDC identifiers: ZOSKEX (1315231)**

**XYZ for single molecule:**

37

Zostex

|   |         |         |         |
|---|---------|---------|---------|
| C | 6.39533 | 5.88652 | 6.54964 |
| C | 7.04515 | 4.75785 | 7.04101 |

|   |          |          |         |
|---|----------|----------|---------|
| C | 8.14411  | 4.96402  | 7.83895 |
| C | 8.64055  | 6.17052  | 8.18531 |
| C | 8.42638  | 8.66718  | 8.11925 |
| C | 7.75765  | 9.78446  | 7.67638 |
| C | 6.64319  | 9.65707  | 6.83140 |
| C | 6.20355  | 8.41140  | 6.45309 |
| C | 6.83928  | 7.20808  | 6.88885 |
| C | 8.00059  | 7.36918  | 7.74319 |
| C | 5.57855  | 5.03161  | 4.40835 |
| C | 4.10938  | 5.03553  | 6.36339 |
| C | 5.28640  | 8.87533  | 4.20026 |
| C | 3.77660  | 8.85427  | 6.16304 |
| O | 10.56401 | 7.08916  | 9.21450 |
| O | 10.08288 | 4.97835  | 9.50593 |
| H | 4.92788  | 7.18627  | 5.46792 |
| H | 6.68939  | 3.75766  | 6.78189 |
| H | 9.29713  | 8.76625  | 8.76050 |
| H | 8.09447  | 10.77531 | 7.97838 |
| H | 6.13042  | 10.55401 | 6.48314 |
| H | 6.42768  | 5.53536  | 3.93306 |
| H | 5.84514  | 3.97567  | 4.57248 |
| H | 4.71139  | 5.06933  | 3.73819 |
| H | 3.85959  | 5.56835  | 7.28815 |
| H | 3.23916  | 5.03666  | 5.69535 |
| H | 4.35228  | 3.99139  | 6.61581 |
| H | 6.19134  | 8.41777  | 3.78841 |
| H | 4.42757  | 8.65589  | 3.55590 |
| H | 5.42650  | 9.95994  | 4.26704 |
| H | 2.93526  | 8.62541  | 5.49890 |
| H | 3.62027  | 8.38724  | 7.14078 |
| H | 3.85864  | 9.93945  | 6.28713 |
| H | 8.44419  | 4.26160  | 8.41577 |
| N | 5.23746  | 5.71094  | 5.68036 |
| N | 5.02815  | 8.30776  | 5.55805 |
| N | 9.85837  | 6.09866  | 9.03654 |

## XYZ for crystal:

84

Zostex

|   |           |           |           |
|---|-----------|-----------|-----------|
| O | 9.797701  | 9.324569  | 8.587165  |
| O | 9.331256  | 7.347575  | 9.261835  |
| N | 4.424457  | 7.886197  | 5.356292  |
| N | 4.199215  | 10.443096 | 5.228901  |
| N | 9.073052  | 8.365513  | 8.632422  |
| C | 5.604818  | 8.058296  | 6.192715  |
| C | 6.297469  | 6.950912  | 6.614279  |
| C | 7.430160  | 7.114729  | 7.438969  |
| C | 7.838767  | 8.331544  | 7.797675  |
| C | 7.551586  | 10.835759 | 7.816113  |
| C | 6.869531  | 11.926084 | 7.384492  |
| C | 5.767505  | 11.790336 | 6.541365  |
| C | 5.350096  | 10.565199 | 6.138239  |
| C | 6.024429  | 9.367024  | 6.557288  |
| C | 7.174842  | 9.522321  | 7.410473  |
| C | 4.735157  | 7.290954  | 4.042991  |
| C | 3.350457  | 7.169006  | 6.067838  |
| C | 4.523592  | 10.973890 | 3.866152  |
| C | 2.959249  | 11.033991 | 5.782047  |
| H | 4.127759  | 9.475353  | 5.036976  |
| H | 5.917675  | 6.137639  | 6.419840  |
| H | 8.419168  | 10.814674 | 8.556993  |
| H | 7.197729  | 12.788968 | 7.685370  |
| H | 5.380697  | 12.543310 | 6.243838  |
| H | 5.484578  | 7.595377  | 3.687637  |
| H | 4.832538  | 6.408725  | 4.131829  |
| H | 4.052497  | 7.702081  | 3.494874  |
| H | 3.094817  | 7.484871  | 7.023272  |
| H | 2.646250  | 7.368345  | 5.456026  |
| H | 3.661597  | 6.352375  | 6.336030  |
| H | 5.293487  | 10.514185 | 3.536779  |
| H | 3.813612  | 10.634574 | 3.310492  |
| H | 4.593514  | 11.832717 | 3.905542  |
| H | 2.387514  | 10.801517 | 4.860976  |
| H | 2.838227  | 10.646095 | 6.713175  |
| H | 3.113486  | 11.888323 | 5.774504  |
| O | -4.556257 | 2.816268  | -0.206172 |

|    |           |           |           |
|----|-----------|-----------|-----------|
| O  | -4.089812 | 4.793262  | -0.880843 |
| N  | 0.816987  | 4.254641  | 3.024700  |
| N  | 1.042229  | 1.697741  | 3.152091  |
| N  | -3.831608 | 3.775324  | -0.251430 |
| C  | -0.363375 | 4.082541  | 2.188277  |
| C  | -1.056025 | 5.189925  | 1.766713  |
| C  | -2.188716 | 5.026108  | 0.942024  |
| C  | -2.597324 | 3.809293  | 0.583317  |
| C  | -2.310142 | 1.305079  | 0.564879  |
| C  | -1.628088 | 0.214753  | 0.996500  |
| C  | -0.526061 | 0.350501  | 1.839628  |
| C  | -0.108653 | 1.575639  | 2.242754  |
| C  | -0.782985 | 2.773814  | 1.823704  |
| C  | -1.933398 | 2.618517  | 0.970519  |
| C  | 0.506286  | 4.849884  | 4.338002  |
| C  | 1.890987  | 4.971831  | 2.313154  |
| C  | 0.717852  | 1.166947  | 4.514841  |
| C  | 2.282195  | 1.106847  | 2.598946  |
| H  | 1.113685  | 2.665484  | 3.344016  |
| H  | -0.676231 | 6.003198  | 1.961151  |
| H  | -3.177725 | 1.326164  | -0.176001 |
| H  | -1.956285 | -0.648130 | 0.695622  |
| H  | -0.139254 | -0.402473 | 2.137153  |
| H  | -0.243134 | 4.545460  | 4.693356  |
| H  | 0.408906  | 5.732112  | 4.249163  |
| H  | 1.188946  | 4.438756  | 4.886119  |
| H  | 2.146627  | 4.655967  | 1.357721  |
| H  | 2.595194  | 4.772492  | 2.924966  |
| H  | 1.579847  | 5.788463  | 2.044962  |
| H  | -0.052044 | 1.626653  | 4.844214  |
| H  | 1.427831  | 1.506263  | 5.070500  |
| H  | 0.647930  | 0.308120  | 4.475450  |
| H  | 2.853930  | 1.339320  | 3.520017  |
| H  | 2.403217  | 1.494743  | 1.667817  |
| H  | 2.127957  | 0.252515  | 2.606489  |
| Cl | 0.562549  | 9.158448  | 3.130302  |
| O  | -0.114074 | 10.089131 | 3.922304  |
| O  | -0.118291 | 8.335442  | 2.288012  |
| O  | 1.451305  | 9.971679  | 2.380202  |
| O  | 1.115541  | 8.327844  | 4.081544  |

|    |           |          |          |
|----|-----------|----------|----------|
| Cl | 4.678895  | 2.982389 | 5.250692 |
| O  | 5.355518  | 2.051706 | 4.458688 |
| O  | 5.359734  | 3.805396 | 6.092981 |
| O  | 3.790138  | 2.169159 | 6.000791 |
| O  | 4.125901  | 3.812994 | 4.299448 |
| H  | 8.090280  | 6.380725 | 7.851740 |
| H  | -2.848836 | 5.760113 | 0.529254 |
